# Supplementary material for: Low glucose metabolite 3-phosphoglycerate switches PHGDH from serine synthesis to p53 activation to control cell fate
Source: PubMed Central journal article supplement (PMC10624847; doi:10.1038/s41422-023-00874-4), 2023-09-19

Blots, as shown below, were cut into slices before incubation with primary antibodies. The Pierce™ Prestained Protein MW Marker, Cat. 26612, from ThermoFisher Scientific, was used as the protein marker.

**Fig. 1a**

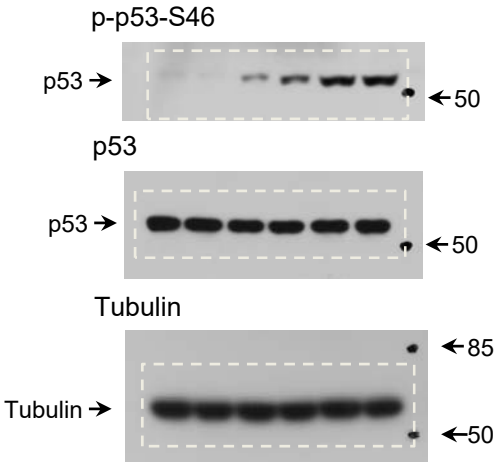

**Fig. 1b**

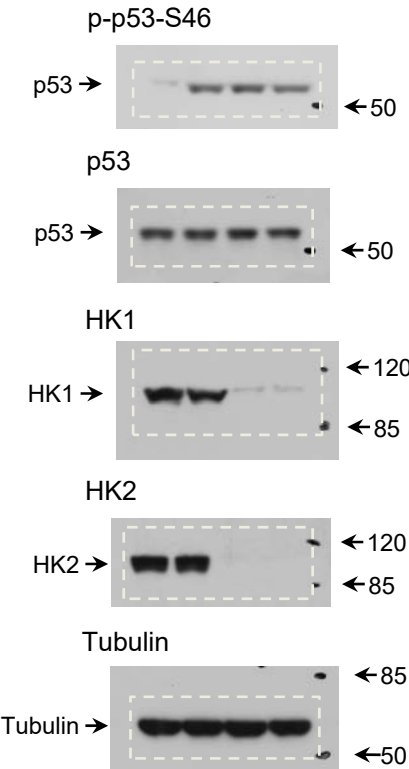

**Fig. 1c**

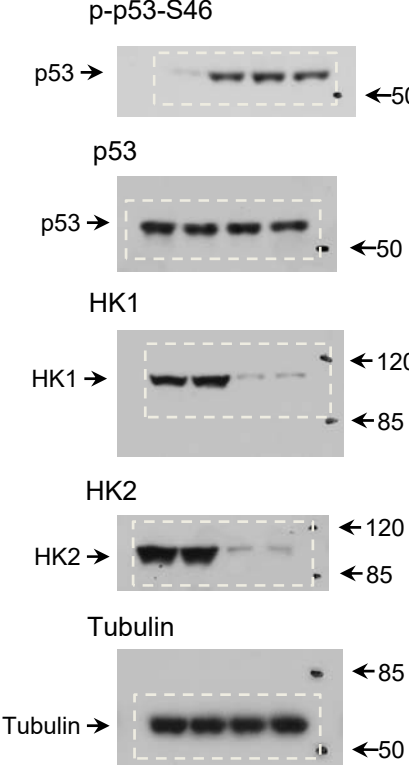

**Fig. 1d**

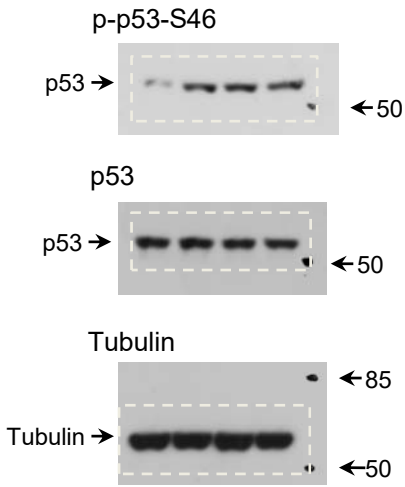

**Fig. 1e**

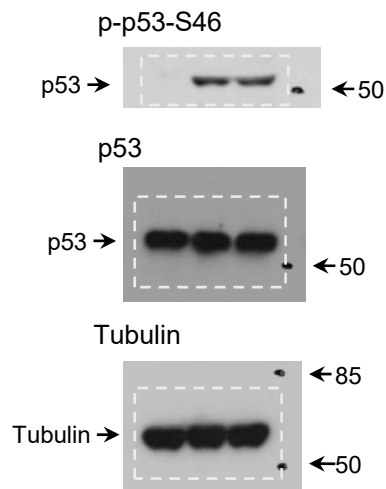

**Fig. 1f**

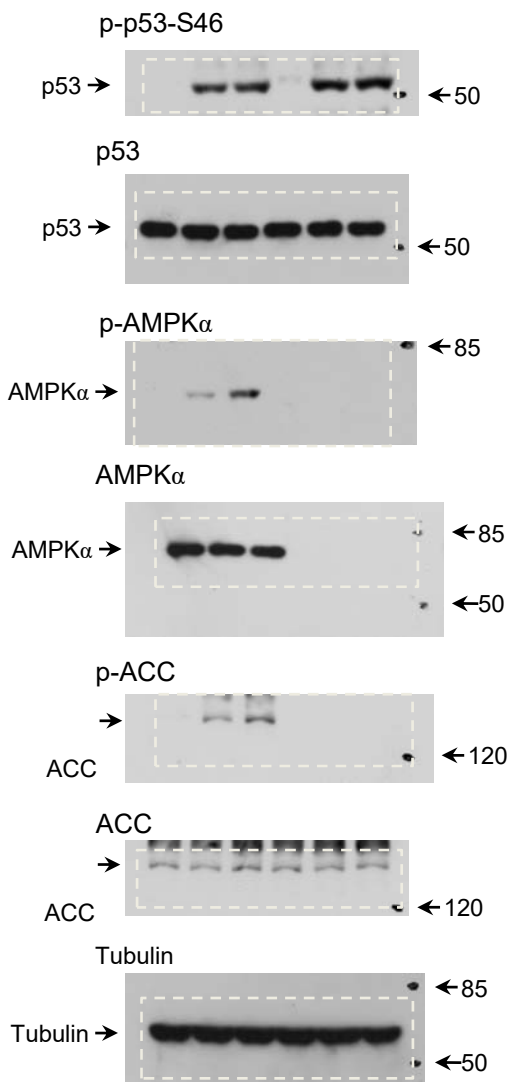

**Fig. 1g**

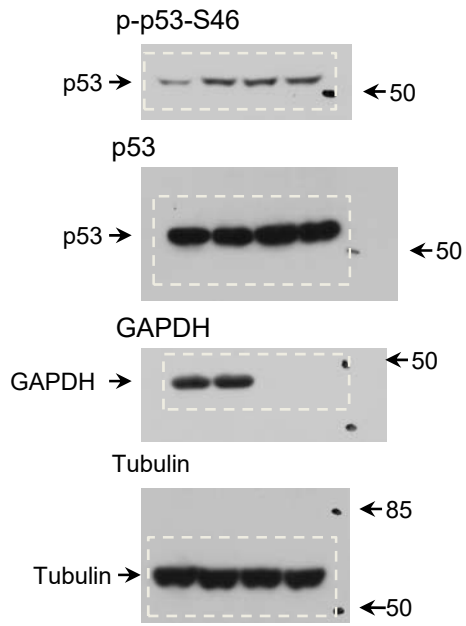

**Fig. 1h**

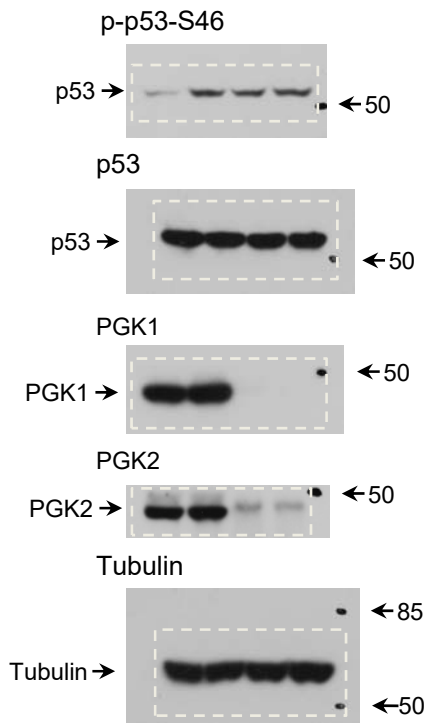

**Fig. 1j**

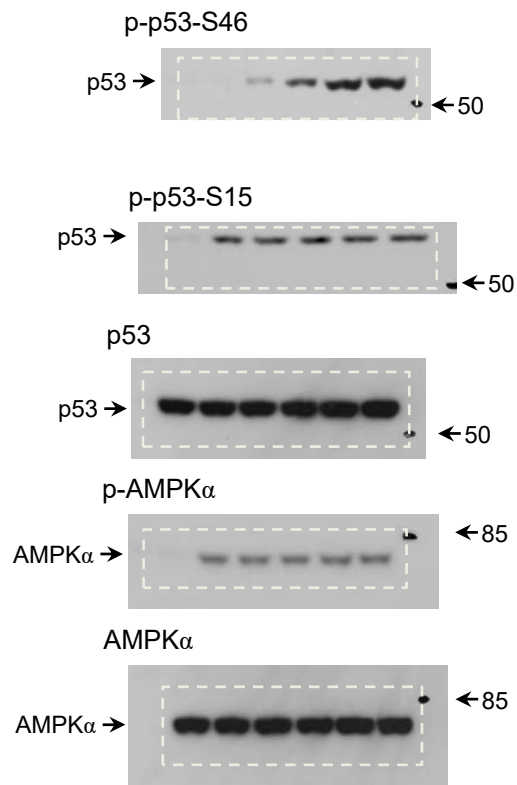

**Fig. 1i**

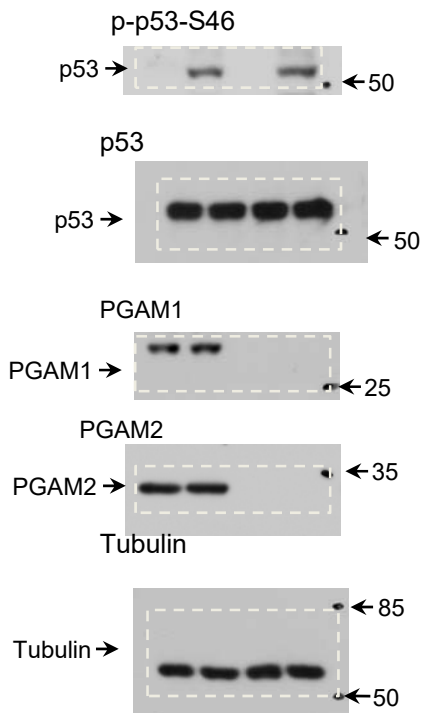

**Fig. 2a (left)**

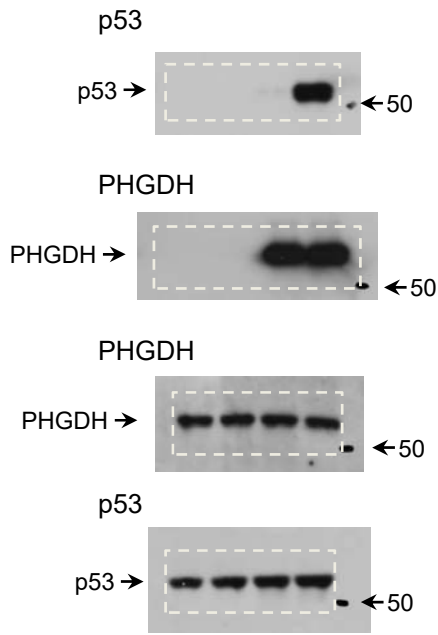

**Fig. 2a (right)**

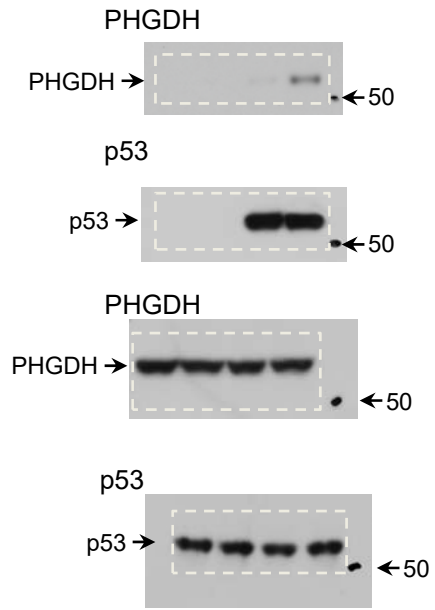

**Fig. 2b**

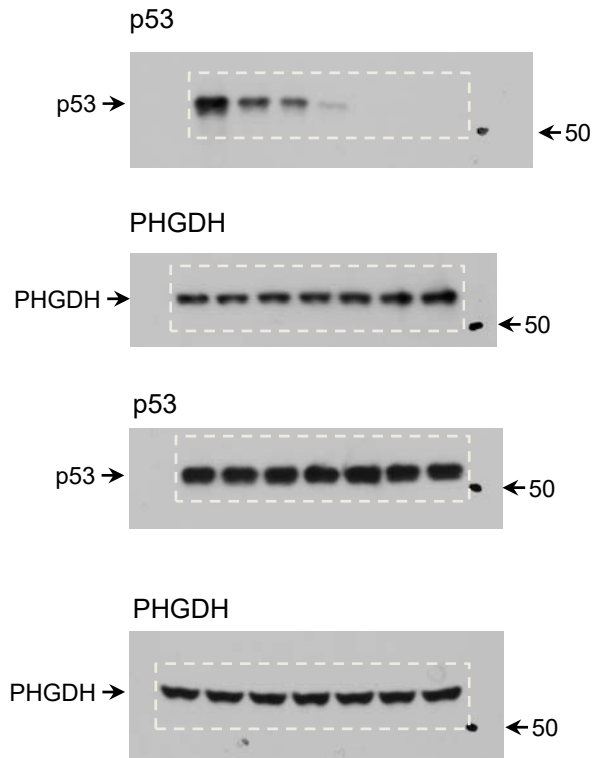

**Fig. 2c**

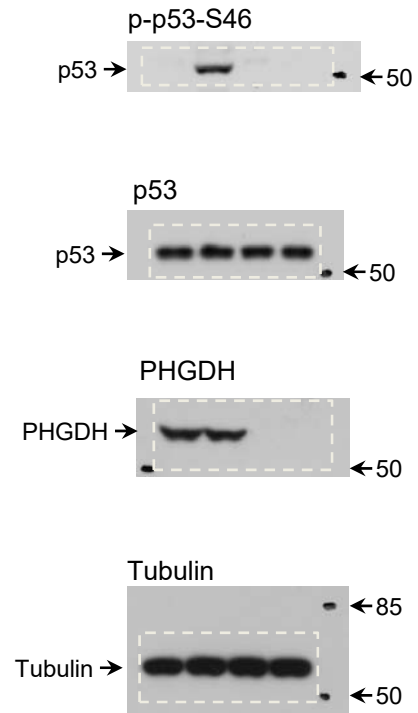

**Fig. 2d**

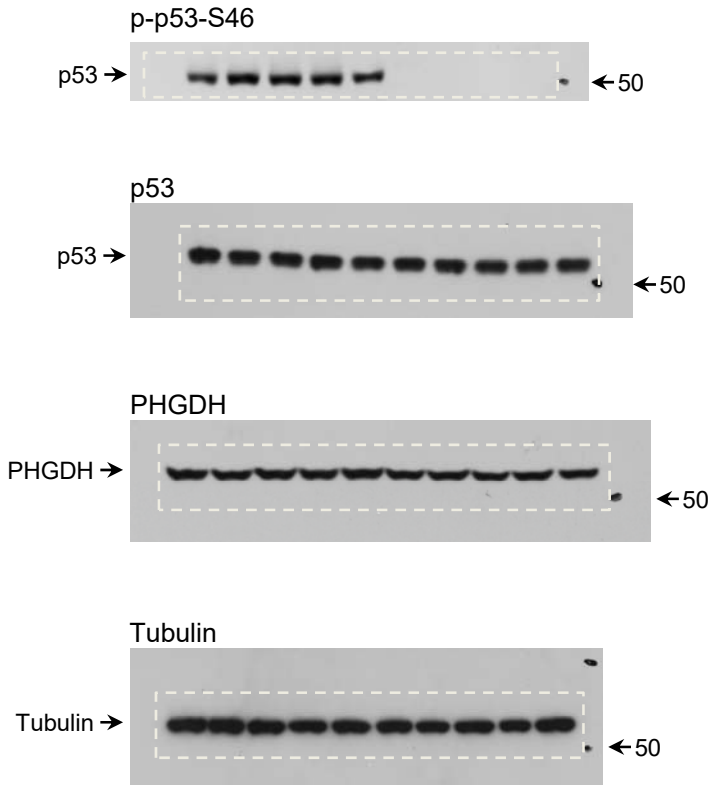

**Fig. 2e**

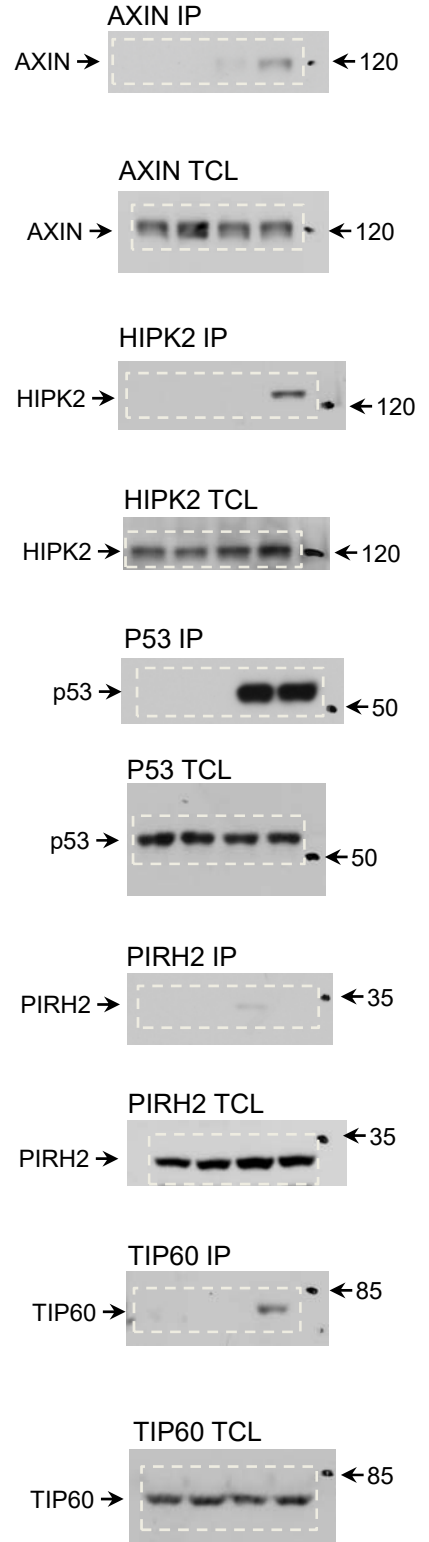

**Fig. 2f**

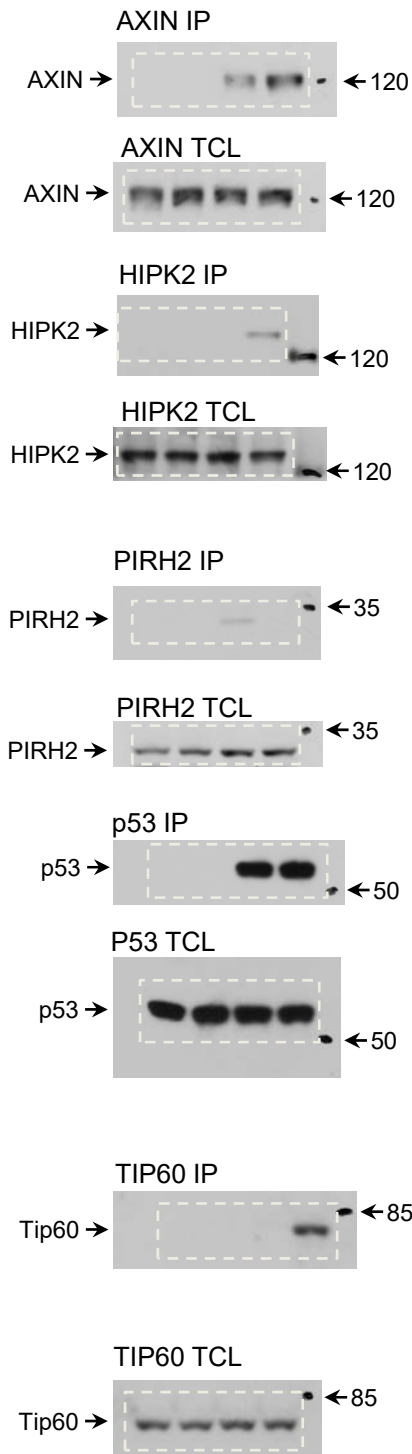

**Fig. 2h**

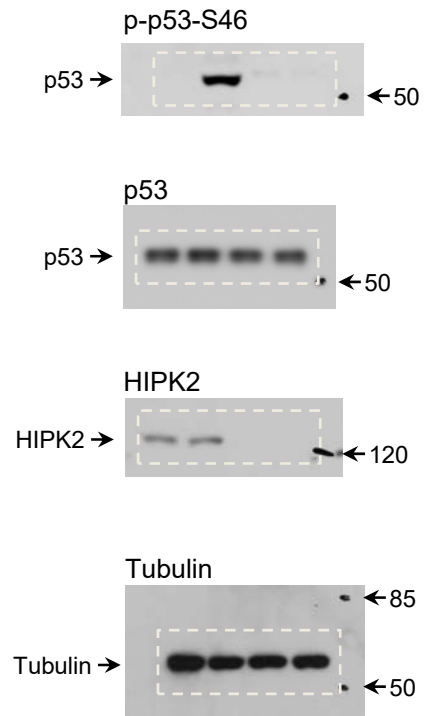

**Fig. 2g**

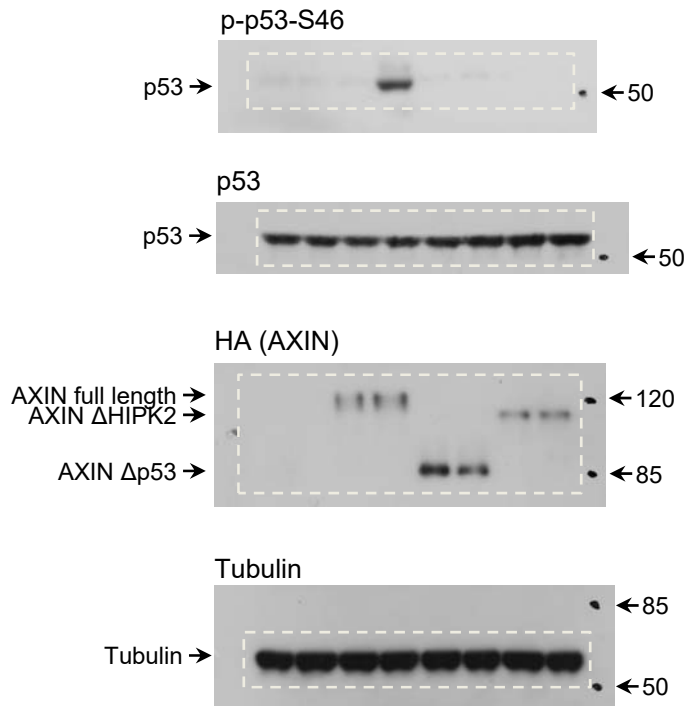

**Fig. 3a**

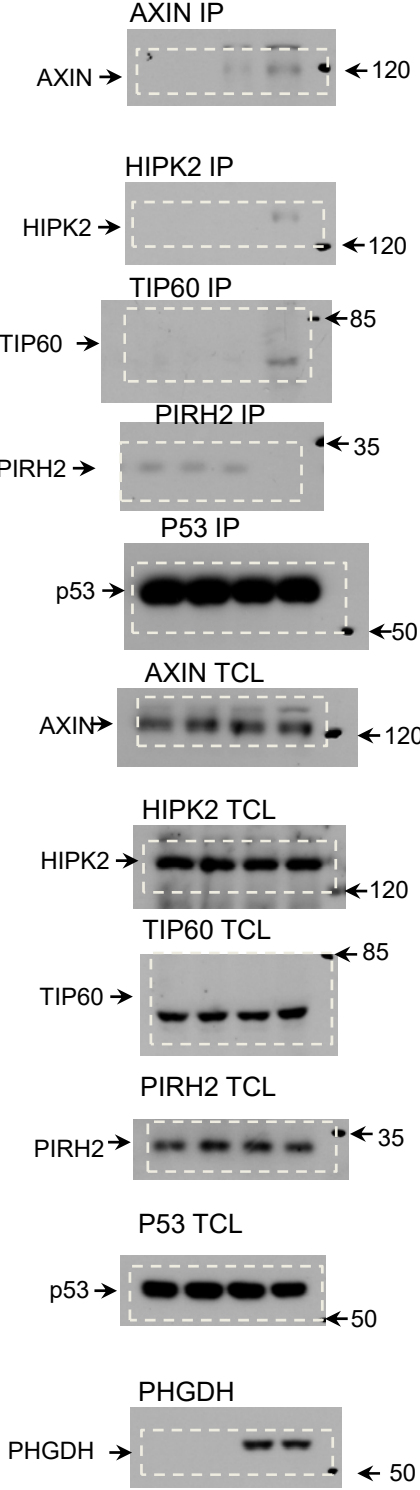

**Fig. 3b (upper)**

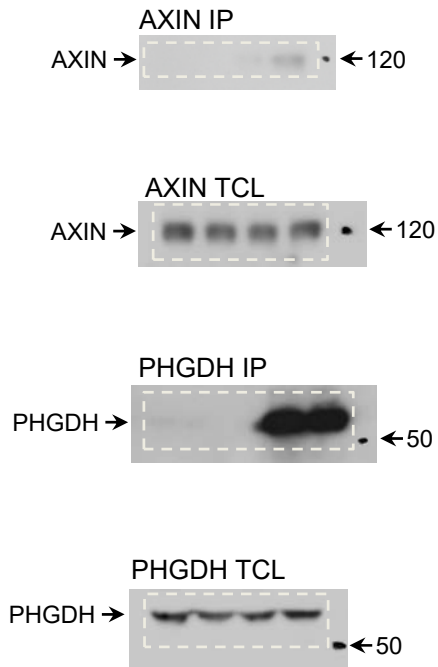

**Fig. 3b (lower)**

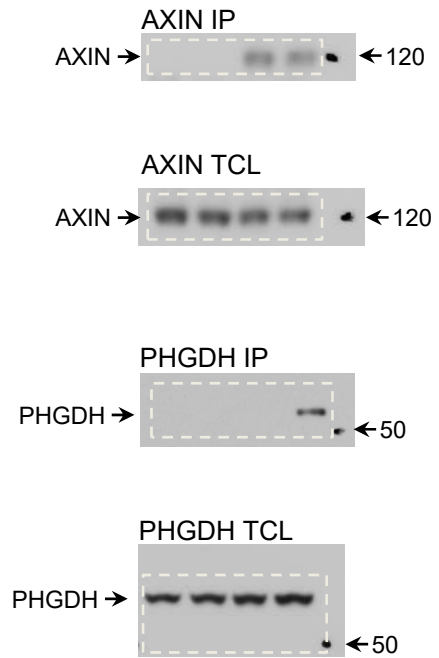

**Fig. 3c (upper)**

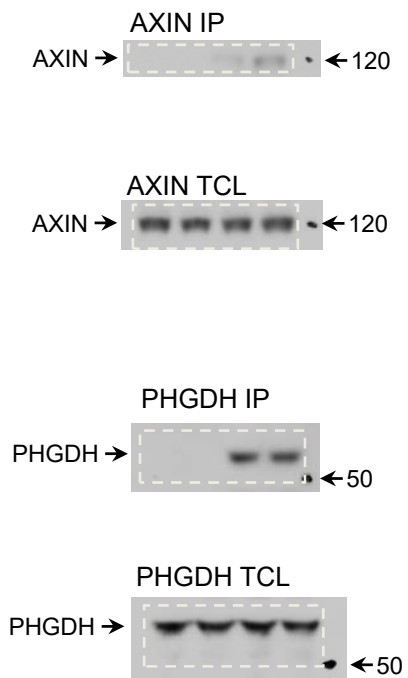

**Fig. 3c (lower)**

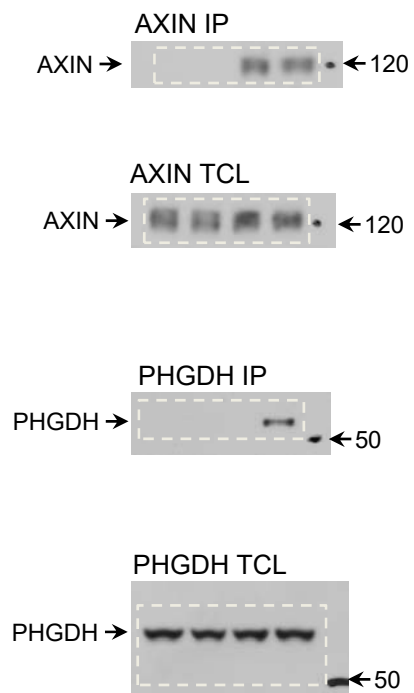



**Fig. 3d**

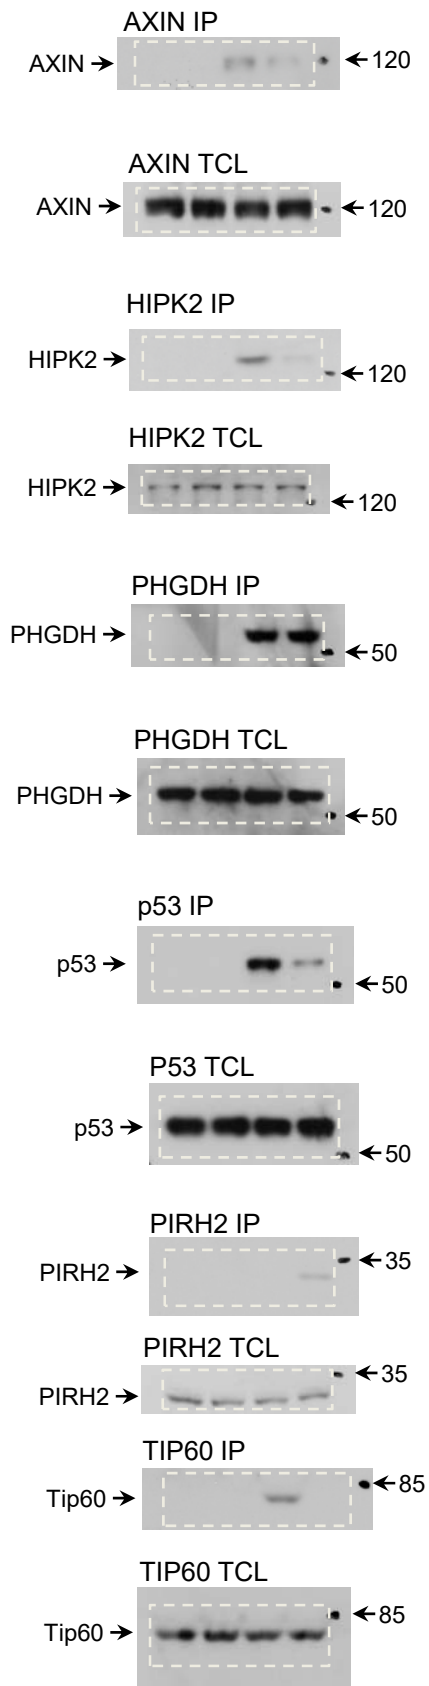

**Fig. 3e**

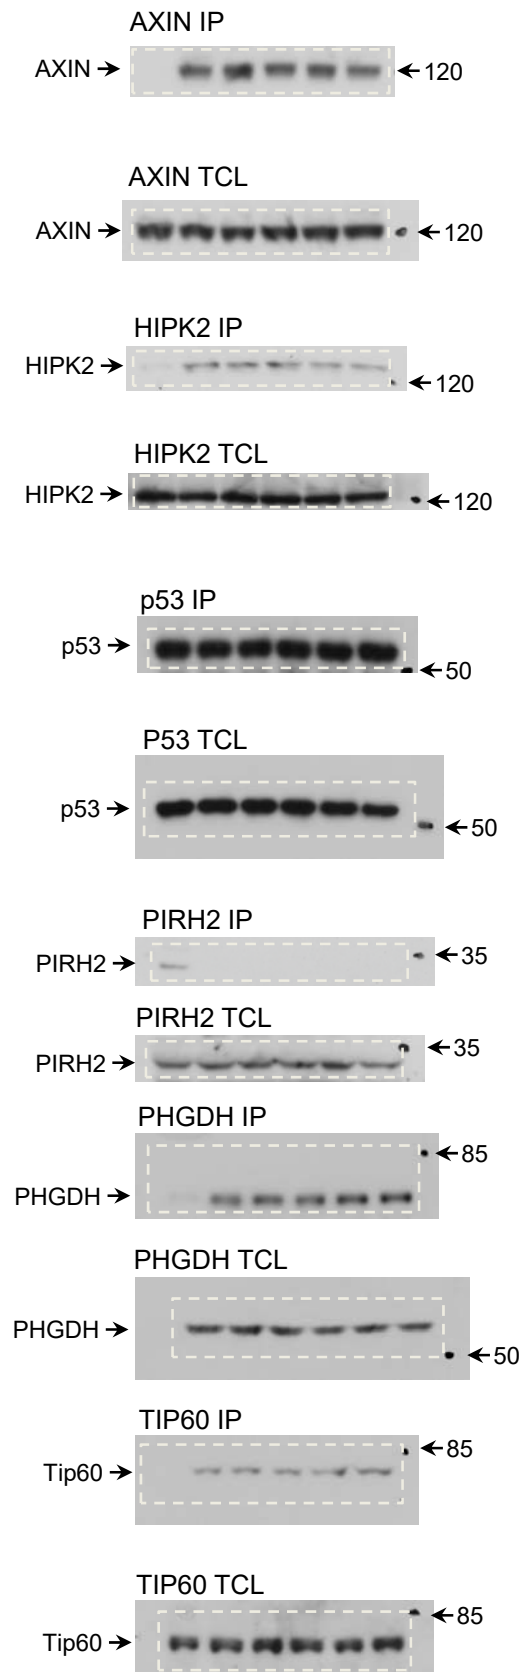

**Fig. 3f**

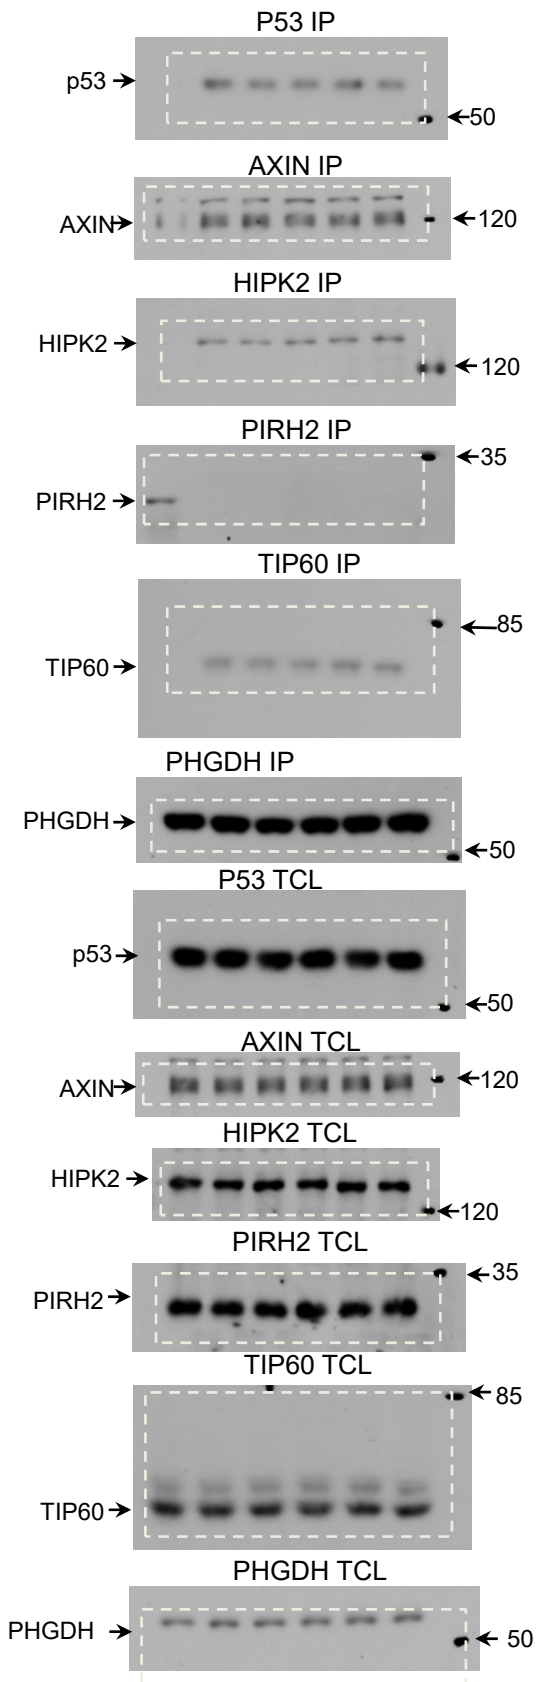

**Fig. 3g**

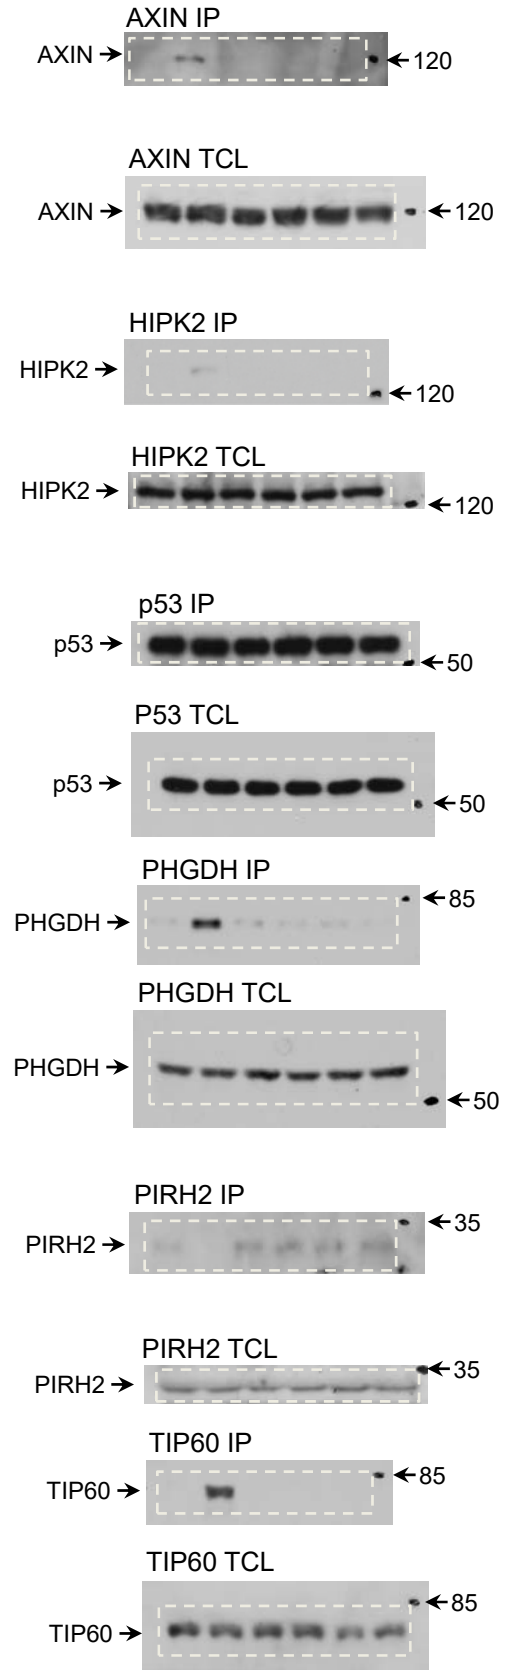

**Fig. 3h**

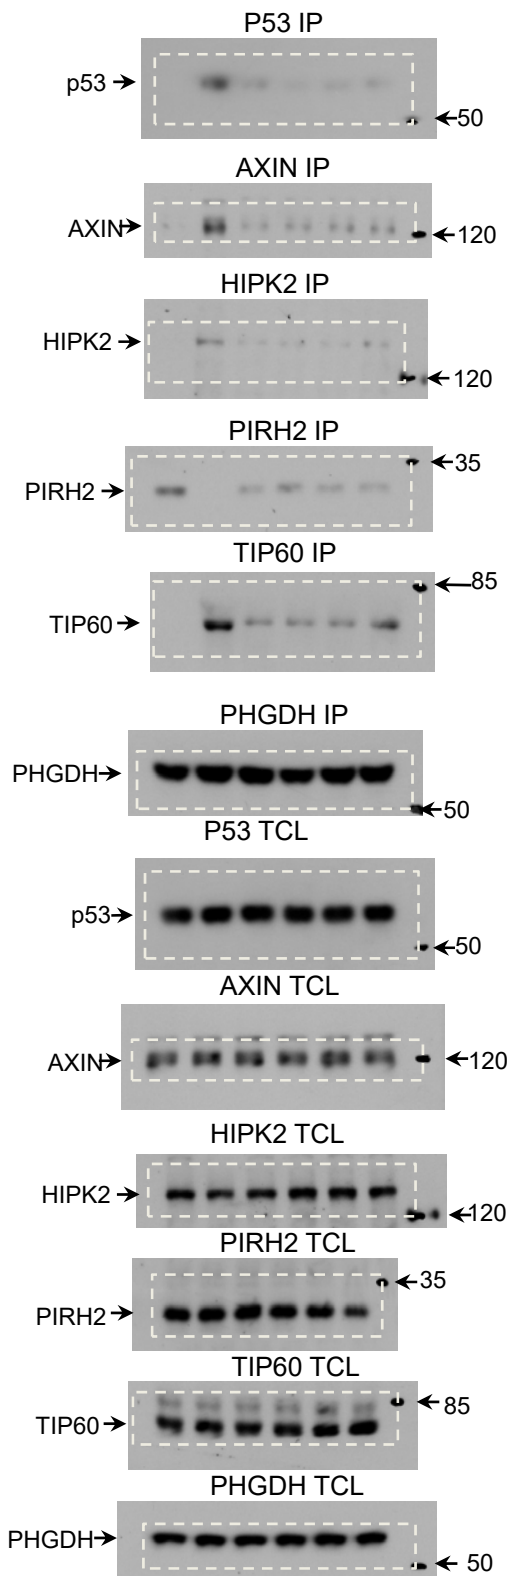

**Fig. 3i**

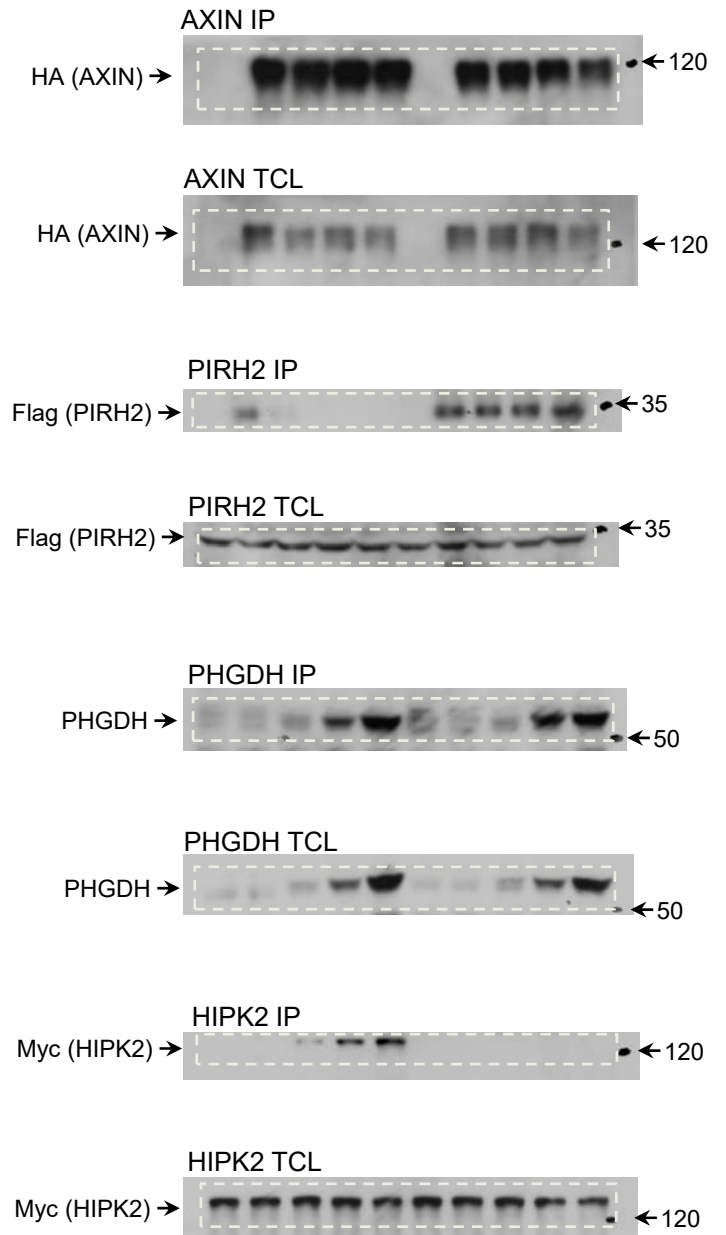

**Fig. 3j**

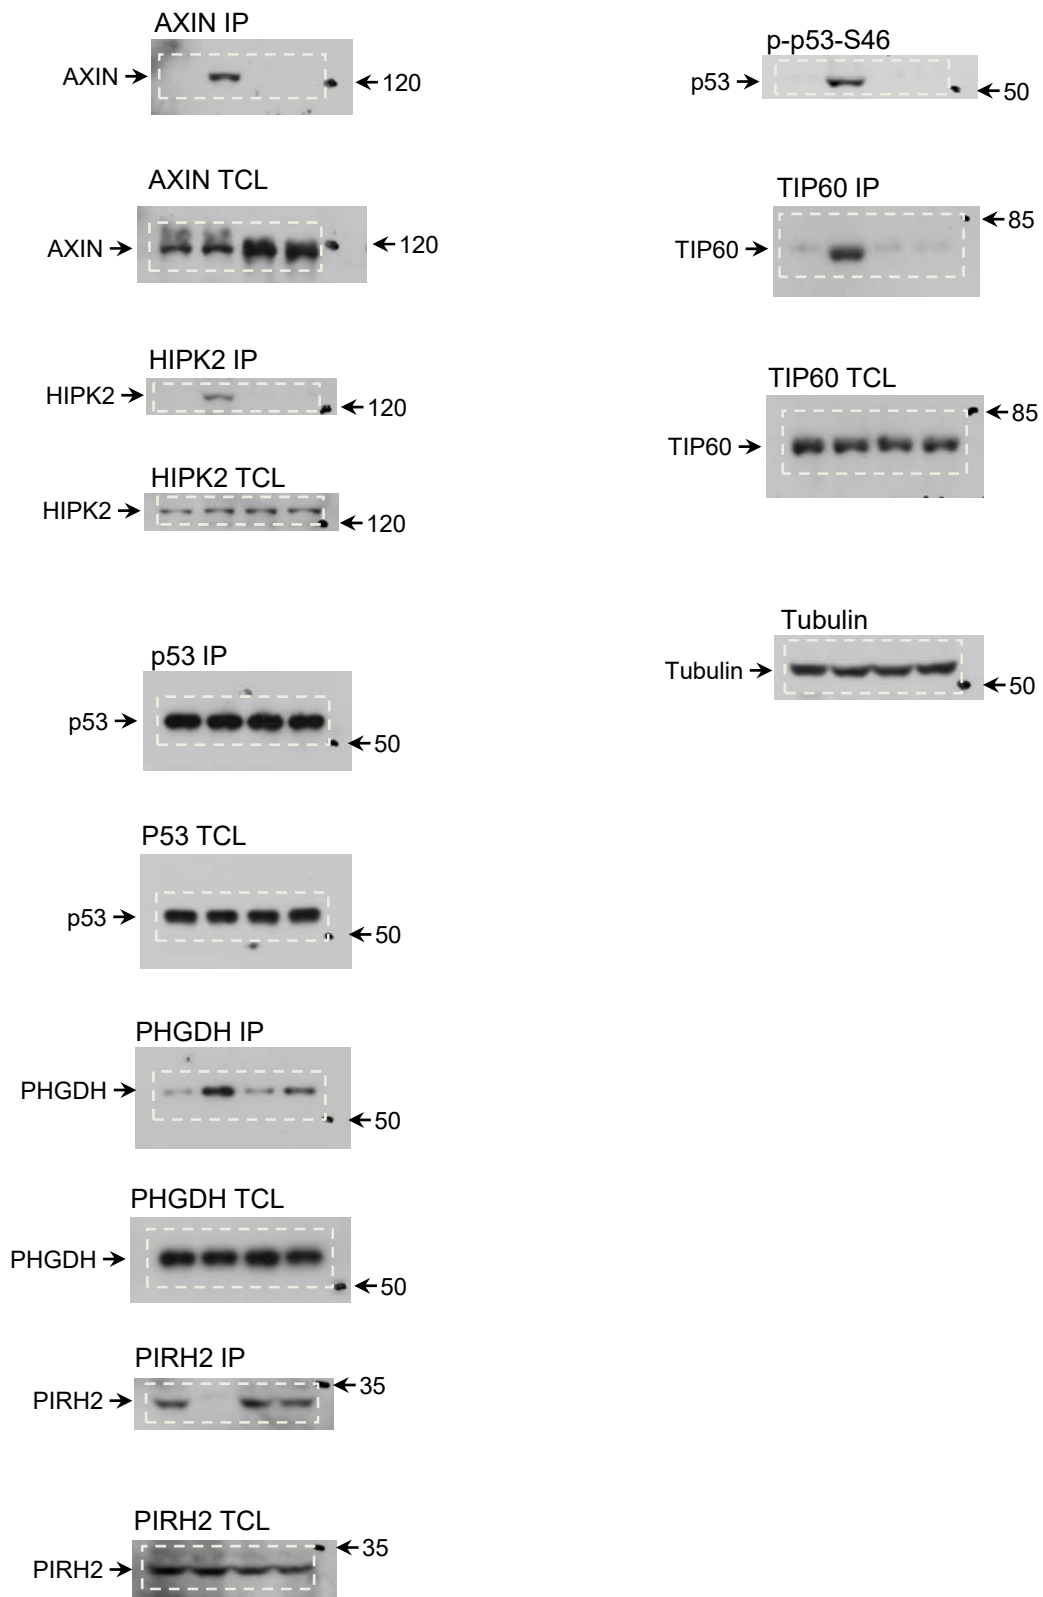

**Fig. 4b**

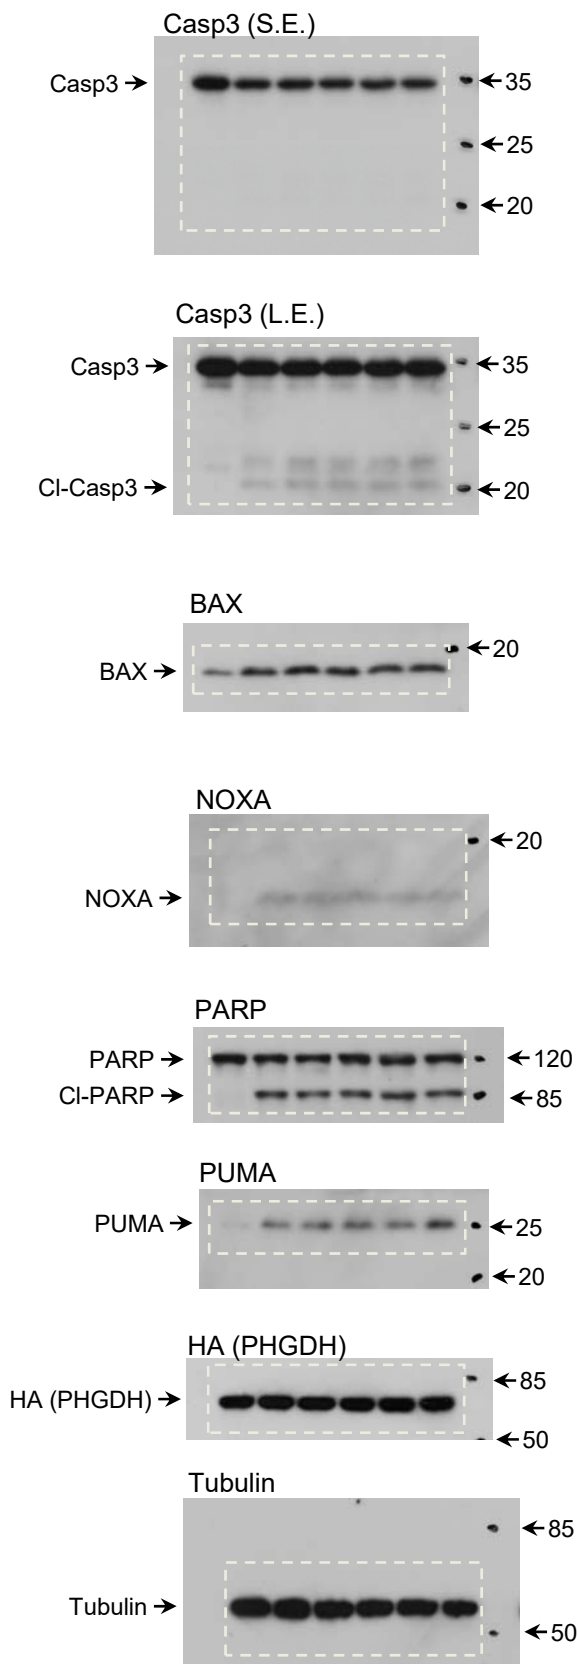

**Fig. 4c**

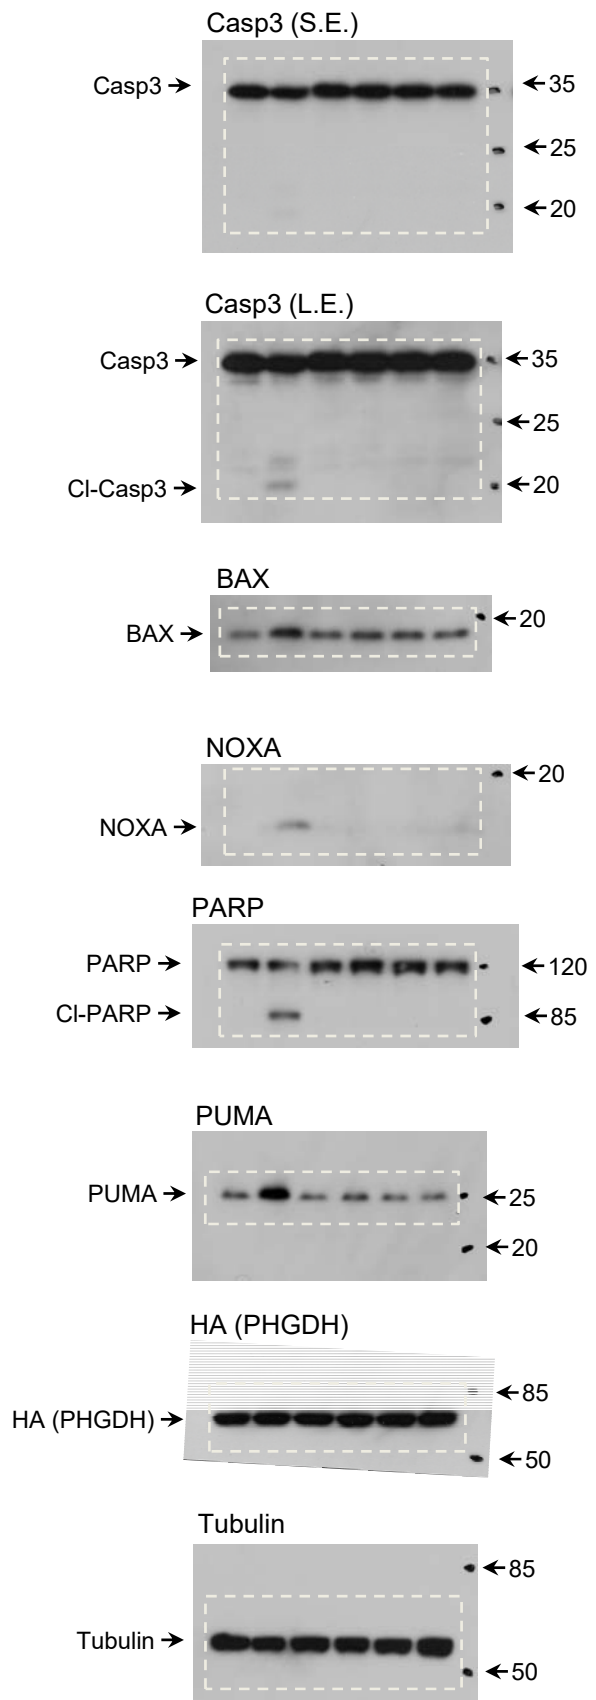

**Fig. 5c**

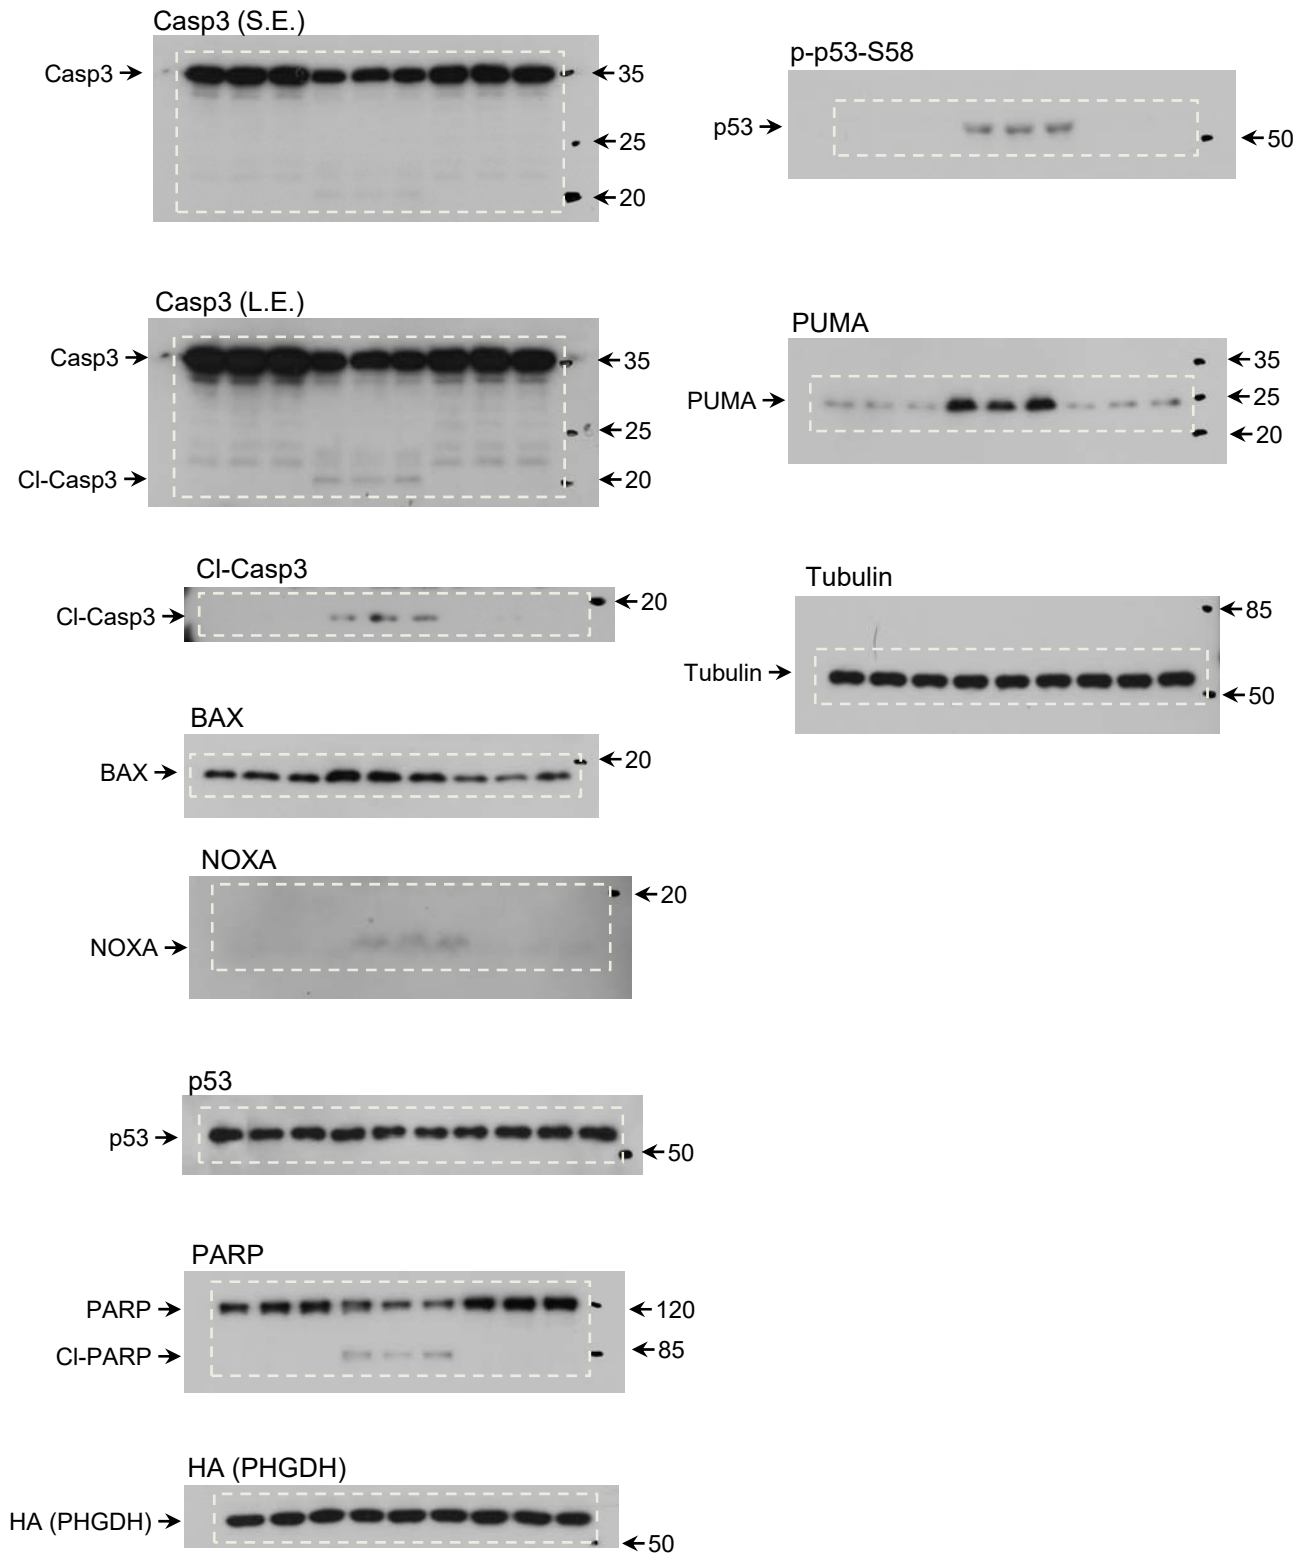

**Supplementary information, Fig. S1a**

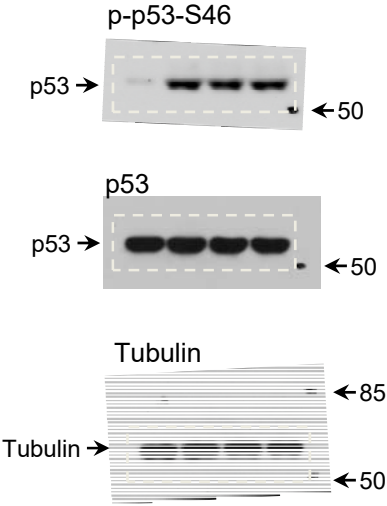

**Supplementary information, Fig. S1b**

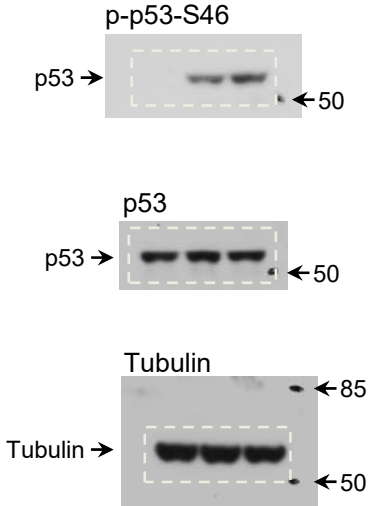

**Supplementary information, Fig. S1c**

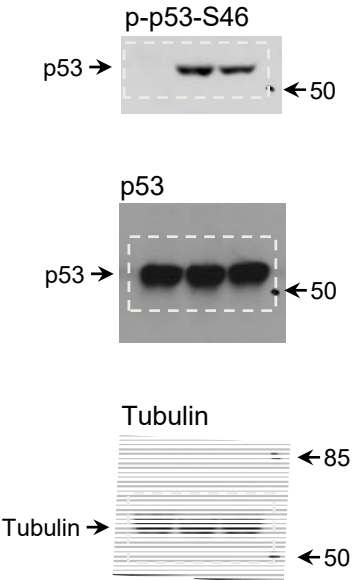

### Supplementary information, Fig. S1d

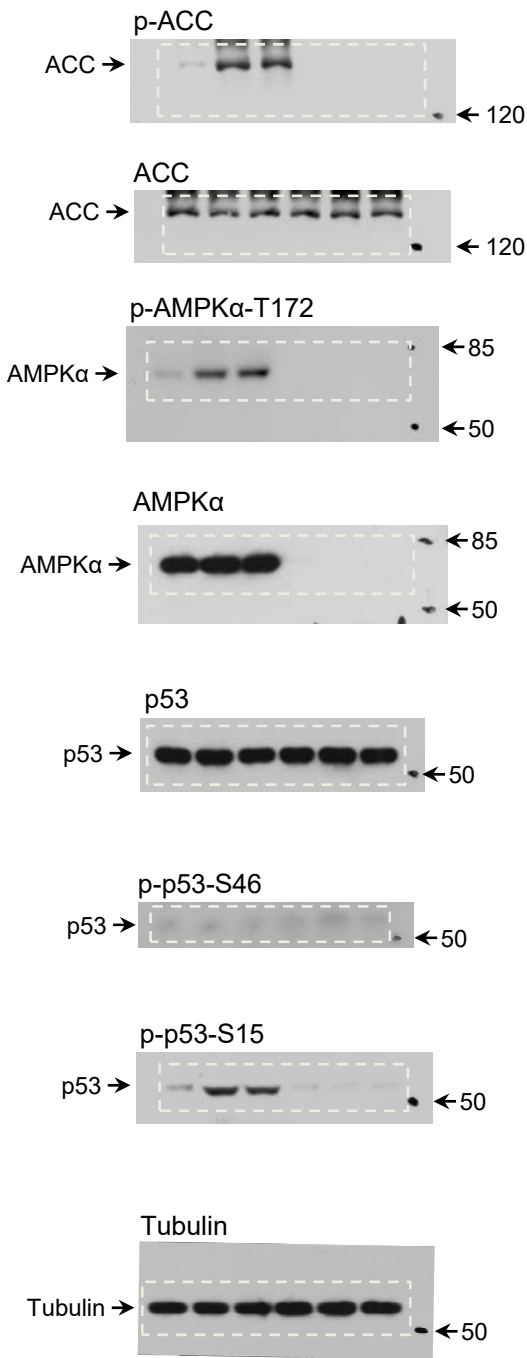

### Supplementary information, Fig. S1e

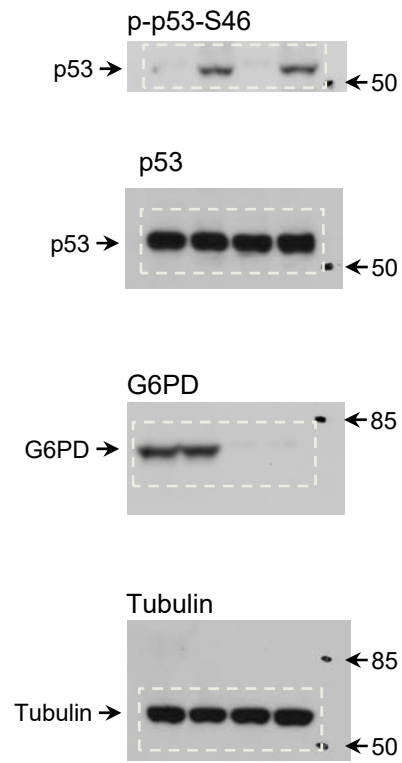

### Supplementary information, Fig. S1f

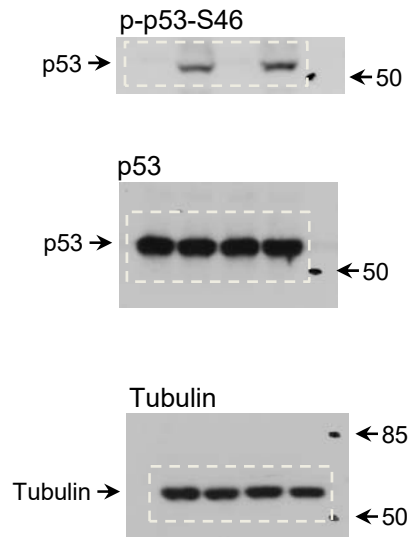



**Supplementary information, Fig. S1h**

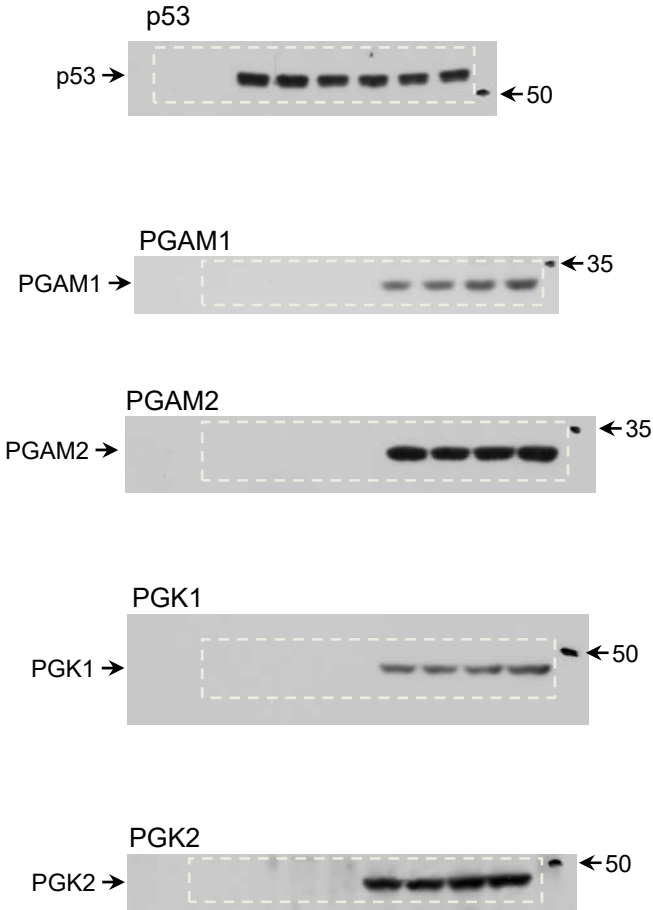

### Supplementary information, Fig. S2b

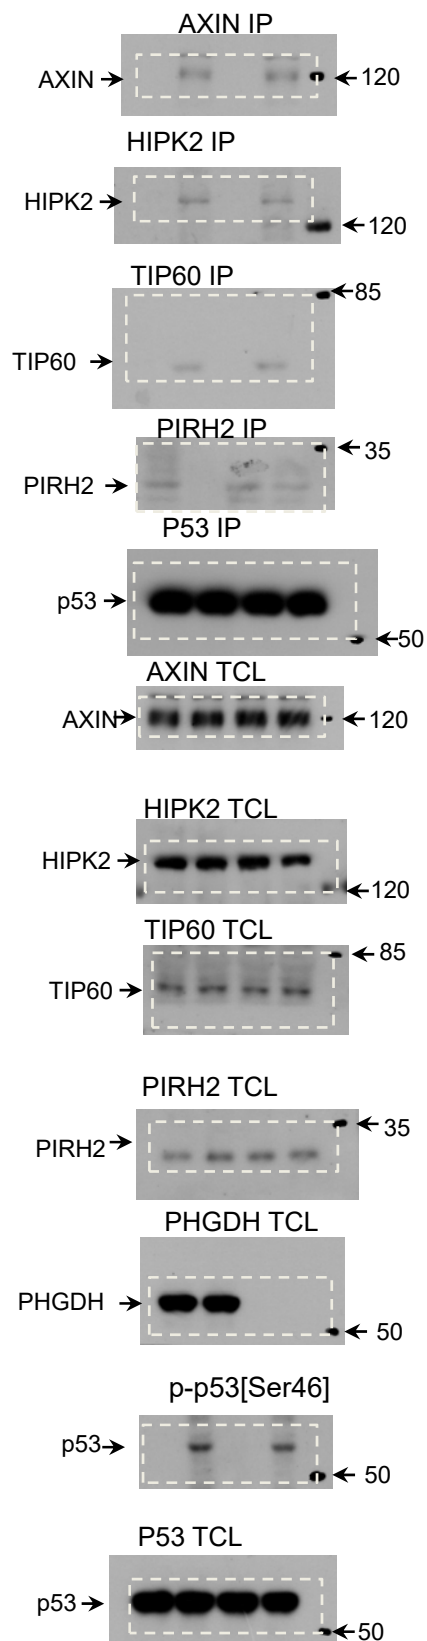

### Supplementary information, Fig. S2c(upper)

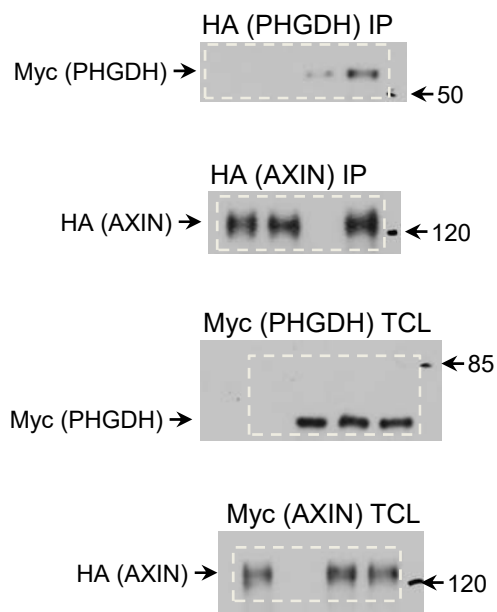

### Supplementary information, Fig. S2c(lower)

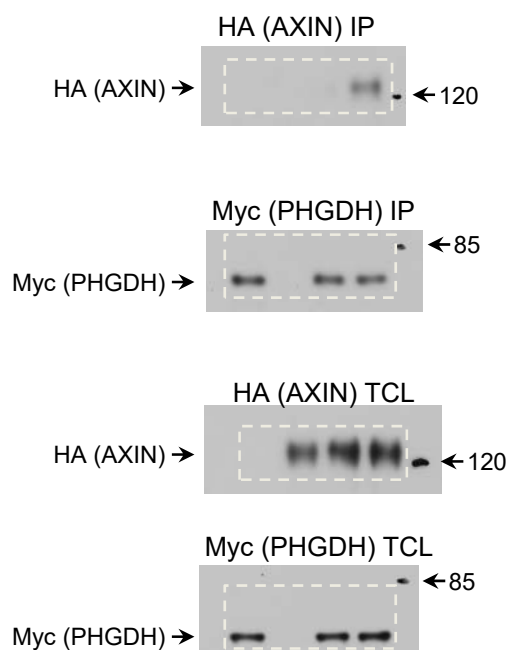

### Supplementary information, Fig. S2d

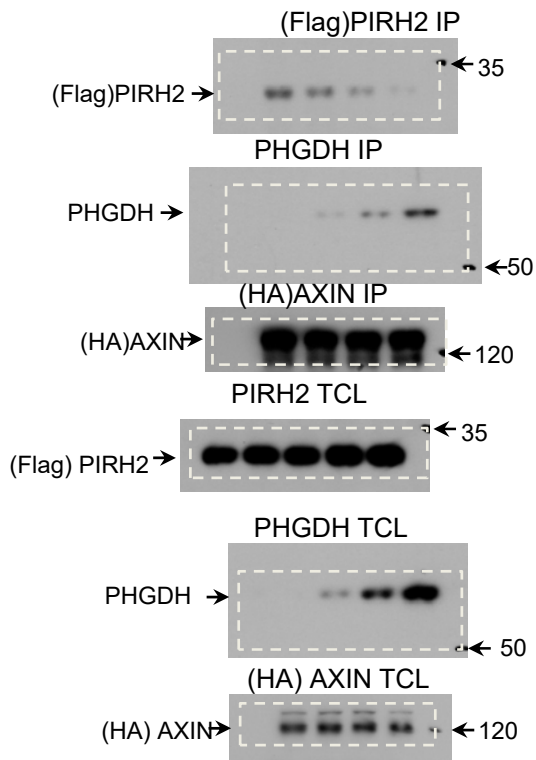

### Supplementary information, Fig. S2e

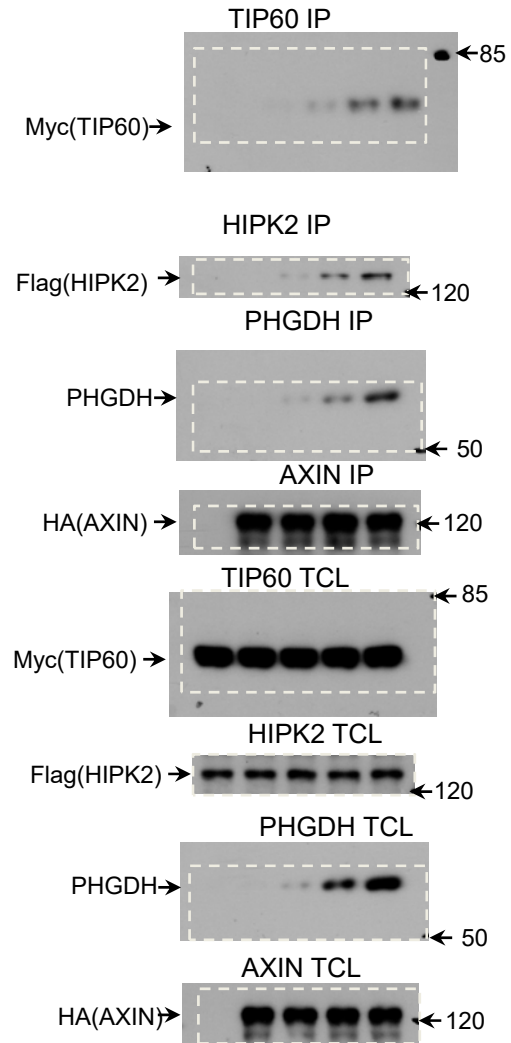

Supplementary information, Fig. S2f

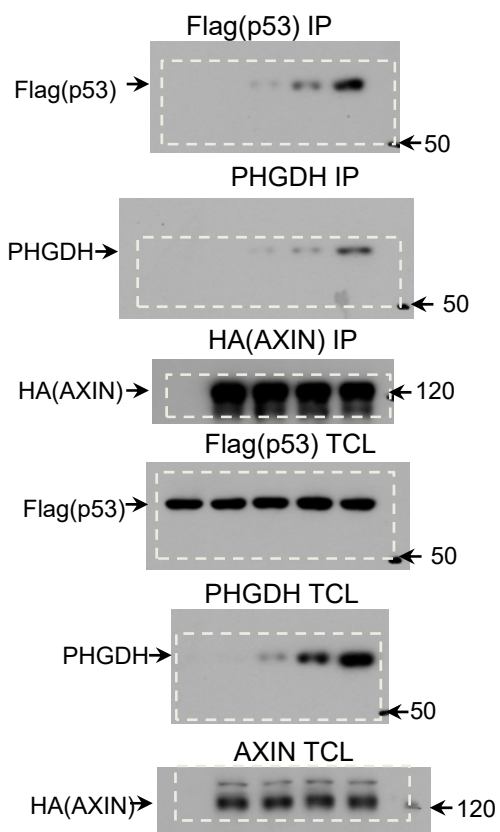

Supplementary information, Fig. S2g

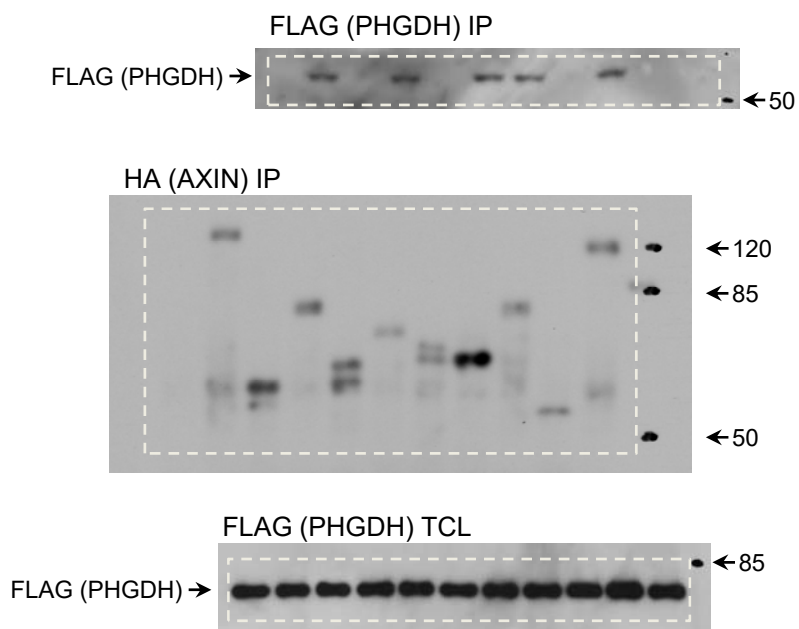

Supplementary information, Fig. S3e

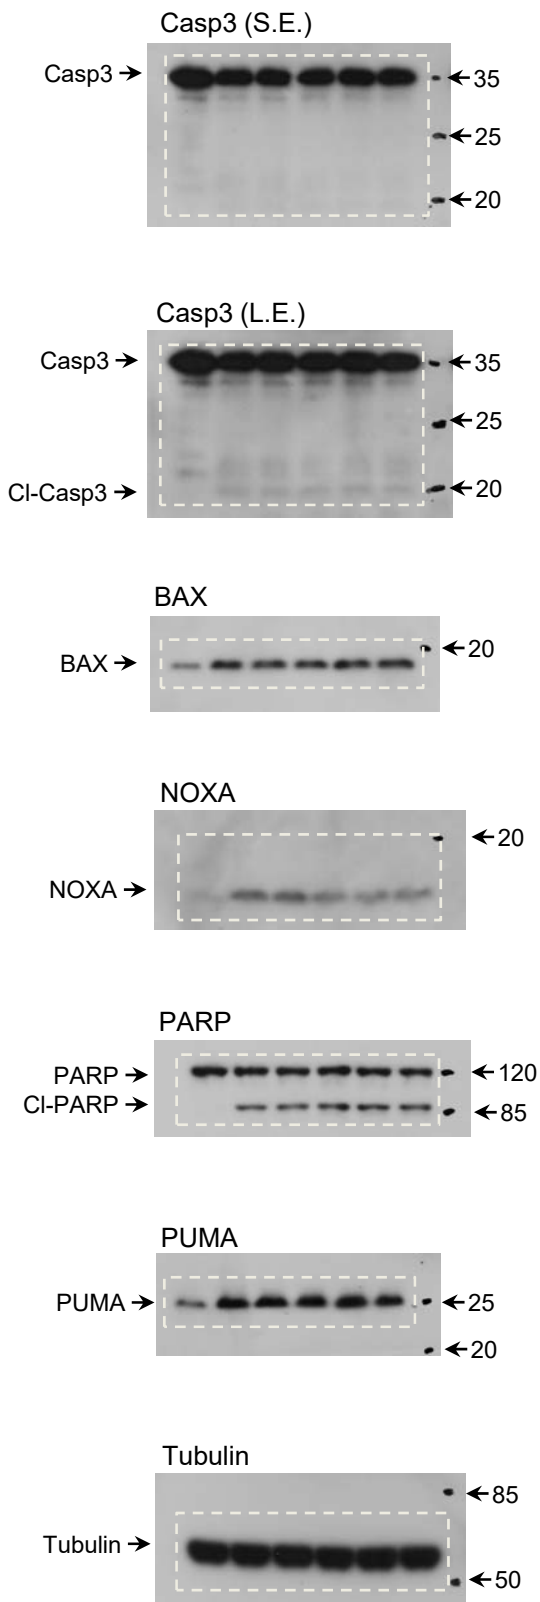

Supplementary information, Fig. S3f

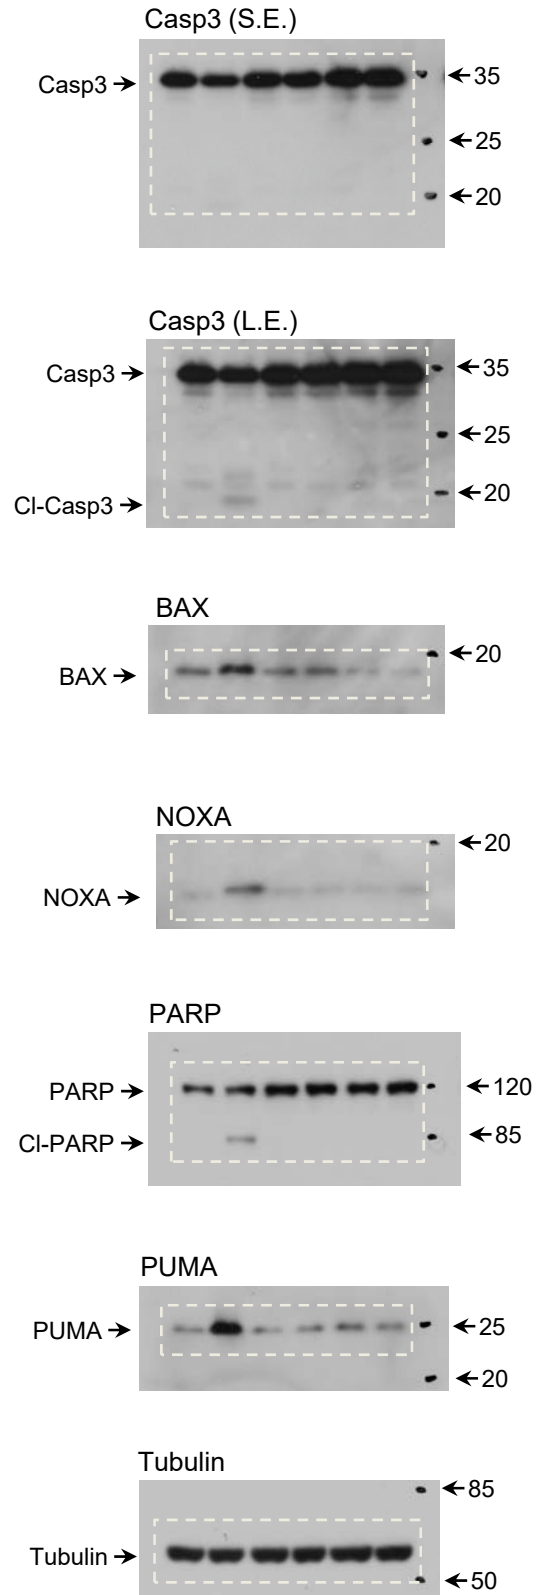

### Supplementary information, Fig. S3g

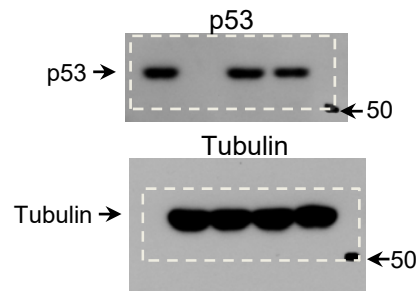

### Supplementary information, Fig. S3j

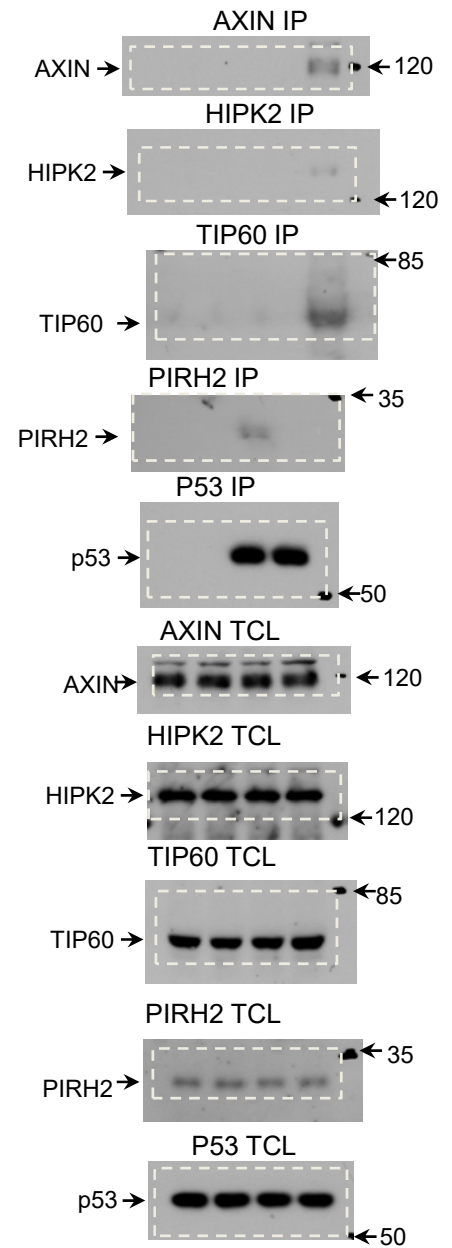

**Supplementary information, Fig. S4b**

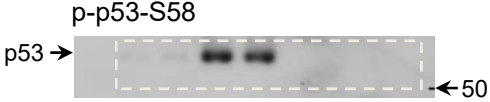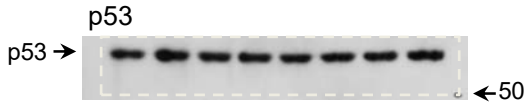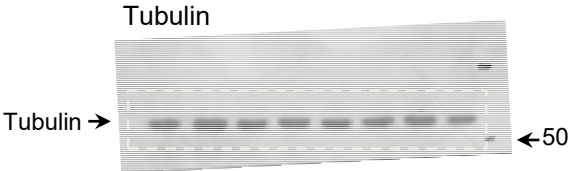

Supplement: 41422_2023_874_MOESM8_ESM.pdf [file 41422_2023_874_MOESM8_ESM.pdf]
