# Supplementary material for: Low glucose metabolite 3-phosphoglycerate switches PHGDH from serine synthesis to p53 activation to control cell fate
Source: PubMed Central journal article supplement (PMC10624847; doi:10.1038/s41422-023-00874-4), 2023-09-19
Supplement: 41422_2023_874_MOESM3_ESM.pdf [file 41422_2023_874_MOESM3_ESM.pdf]

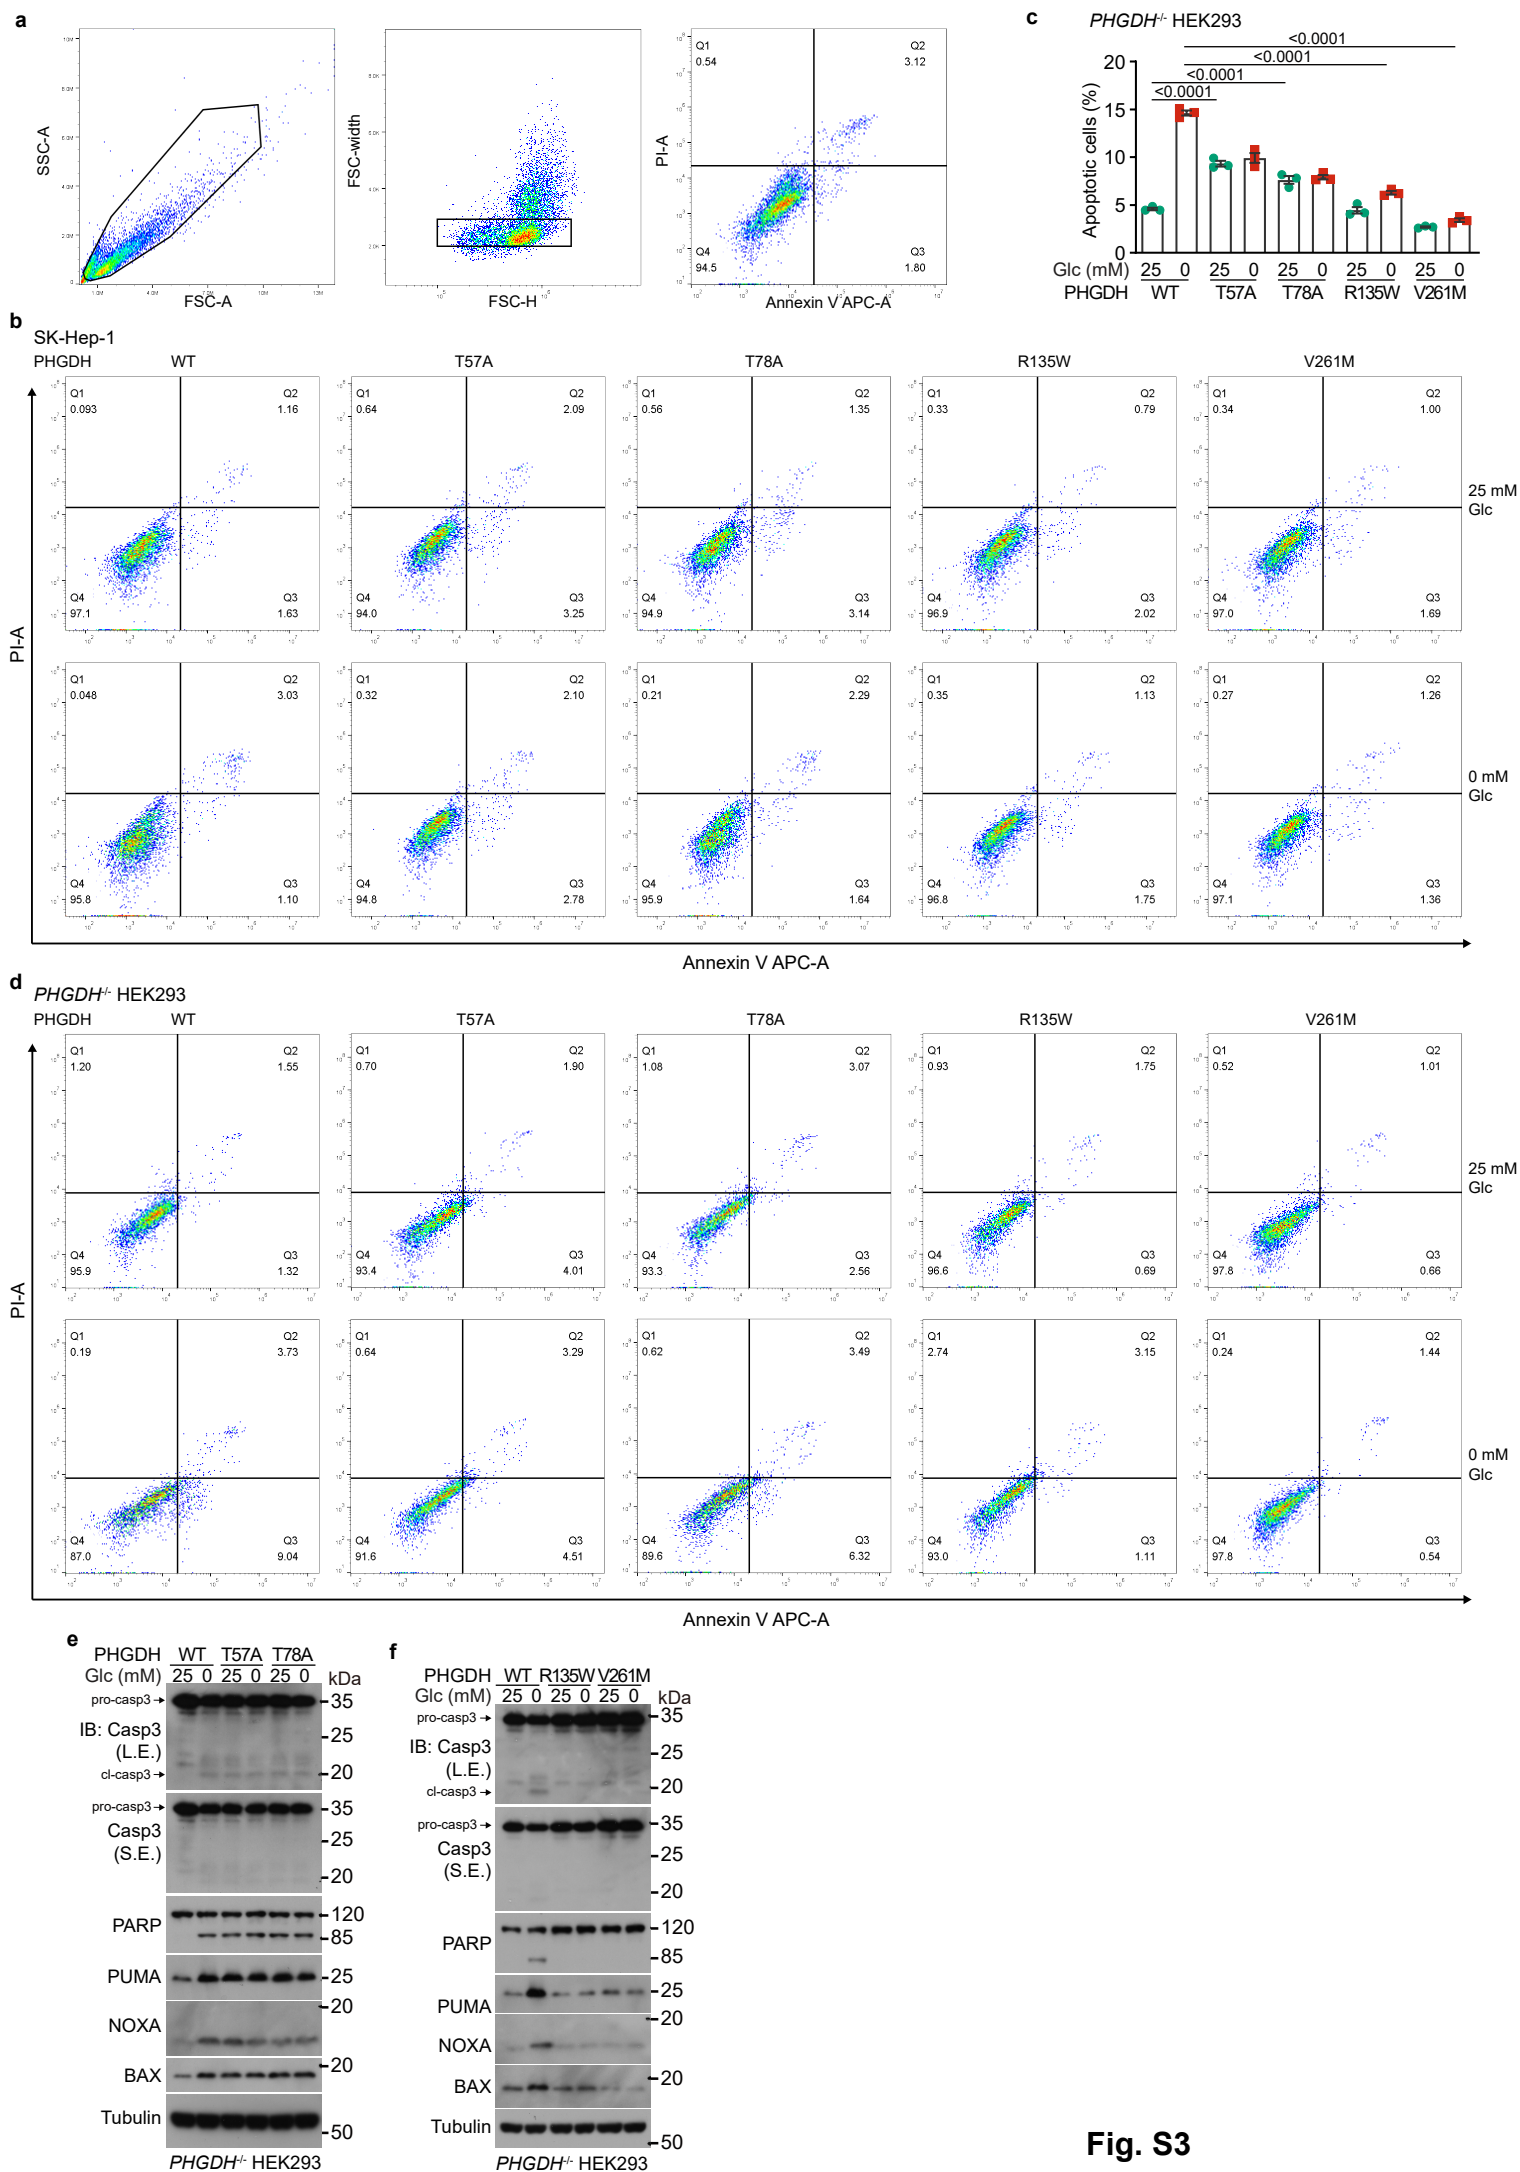

**Fig. S3**

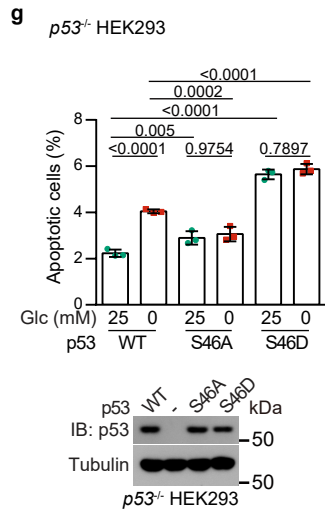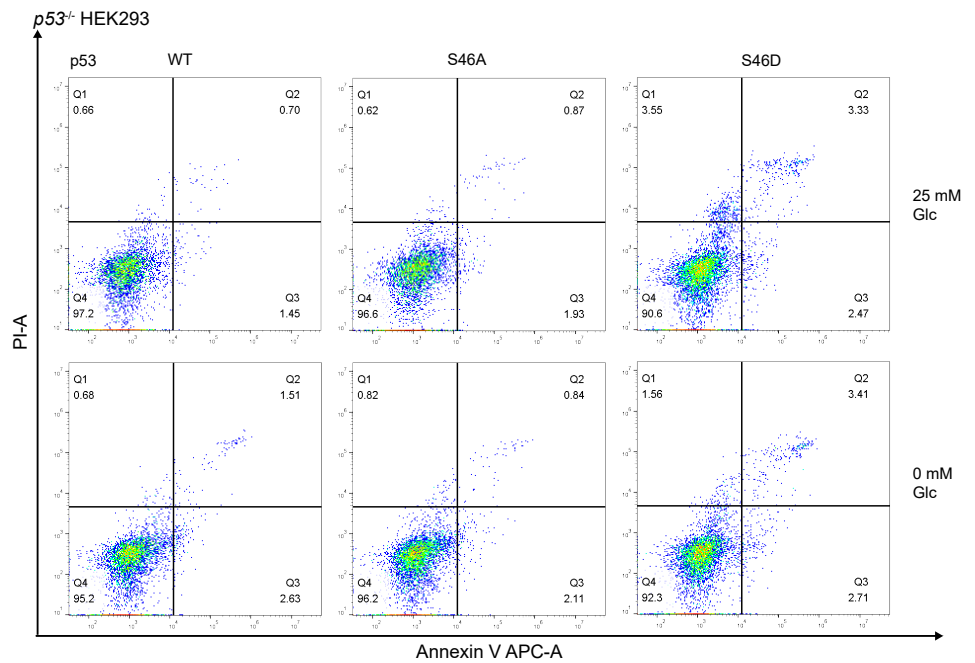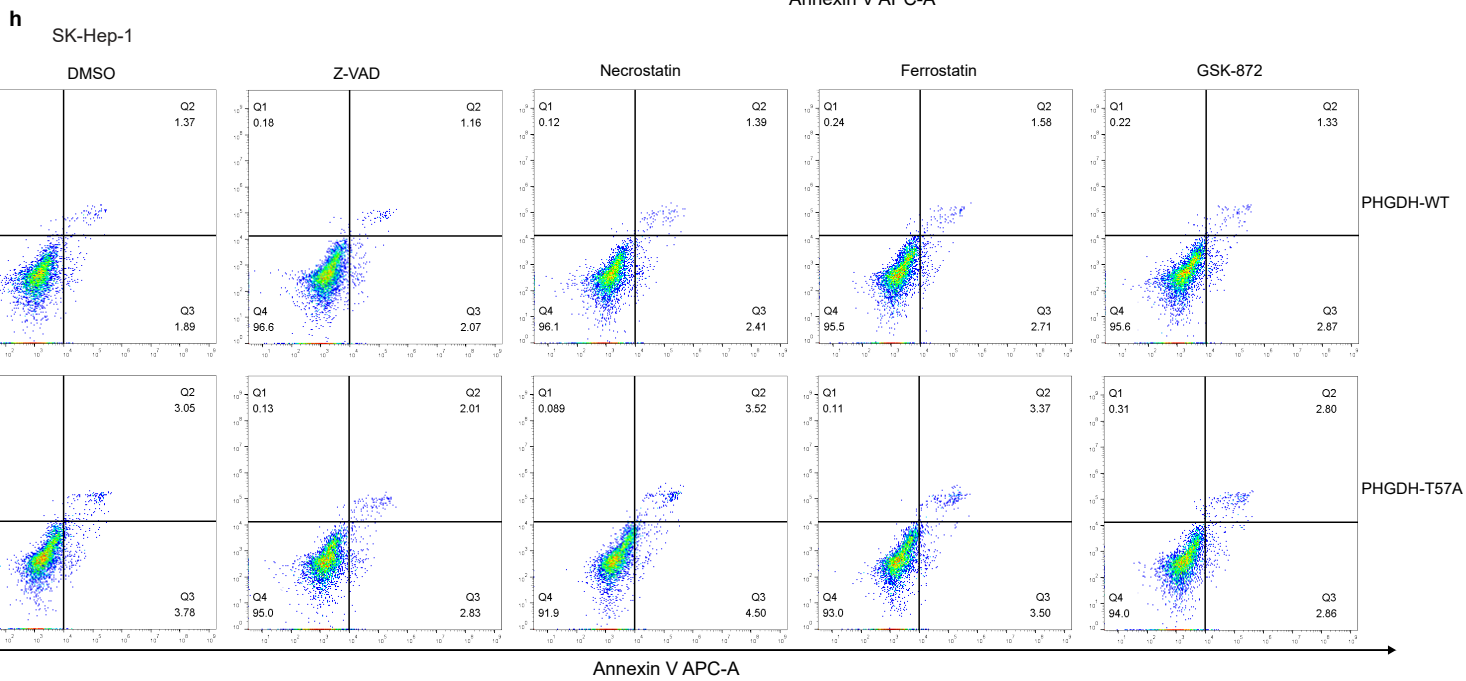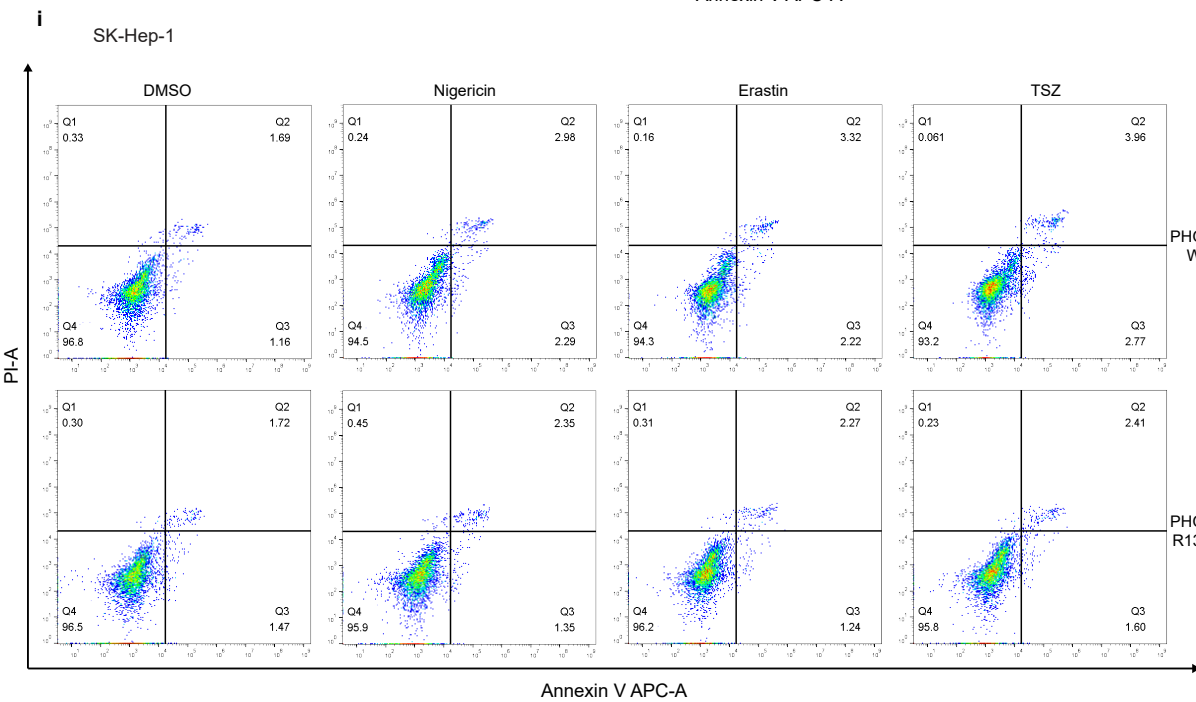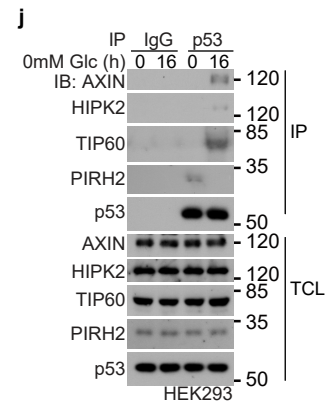

**Fig. S3 (cont.)**

**k** PHGDH<sup>-/-</sup> HEK293

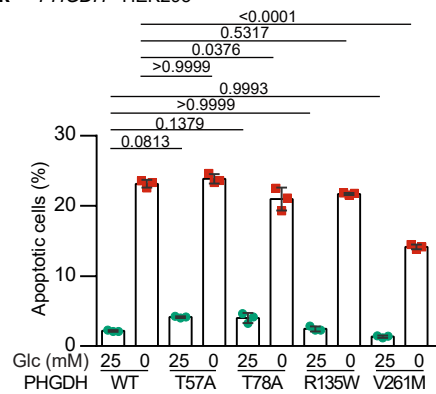

PHGDH<sup>-/-</sup> HEK293

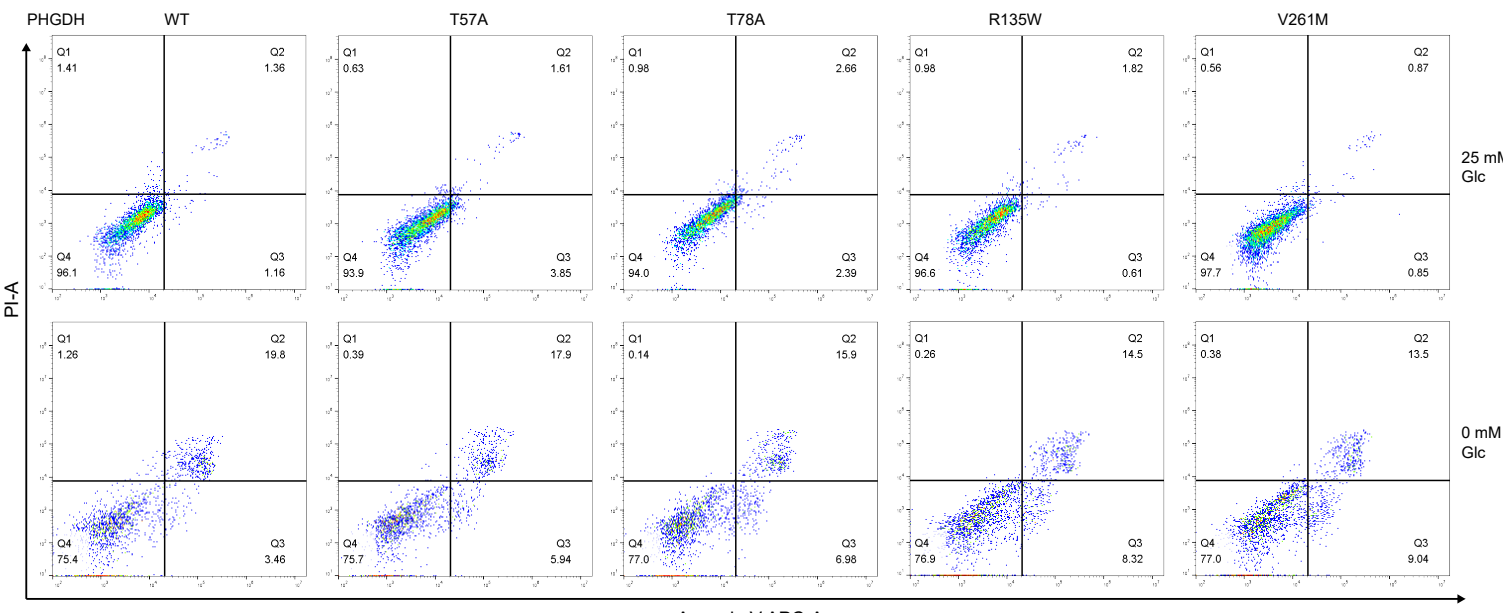

**l** SK-Hep-1

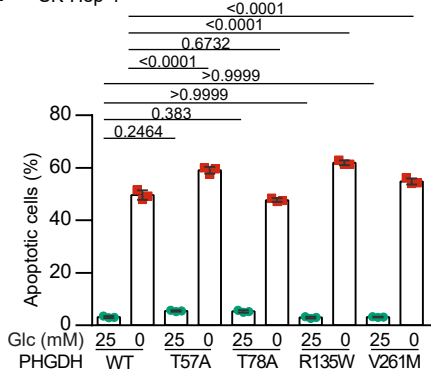

SK-Hep-1

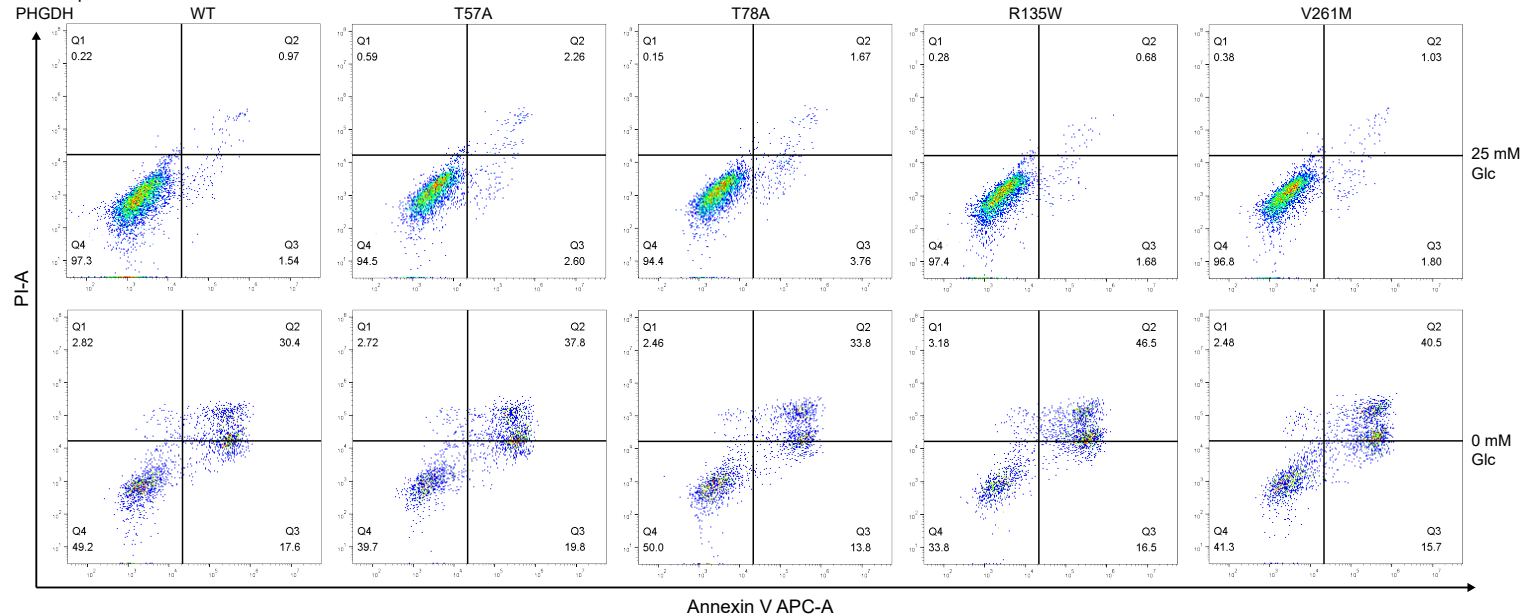

**Fig. S3 (cont.)**

**m** *p53*<sup>-/-</sup> HEK293

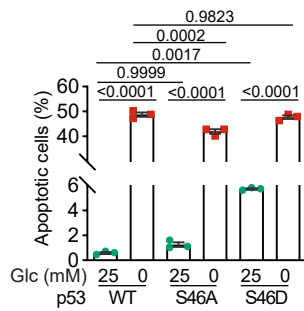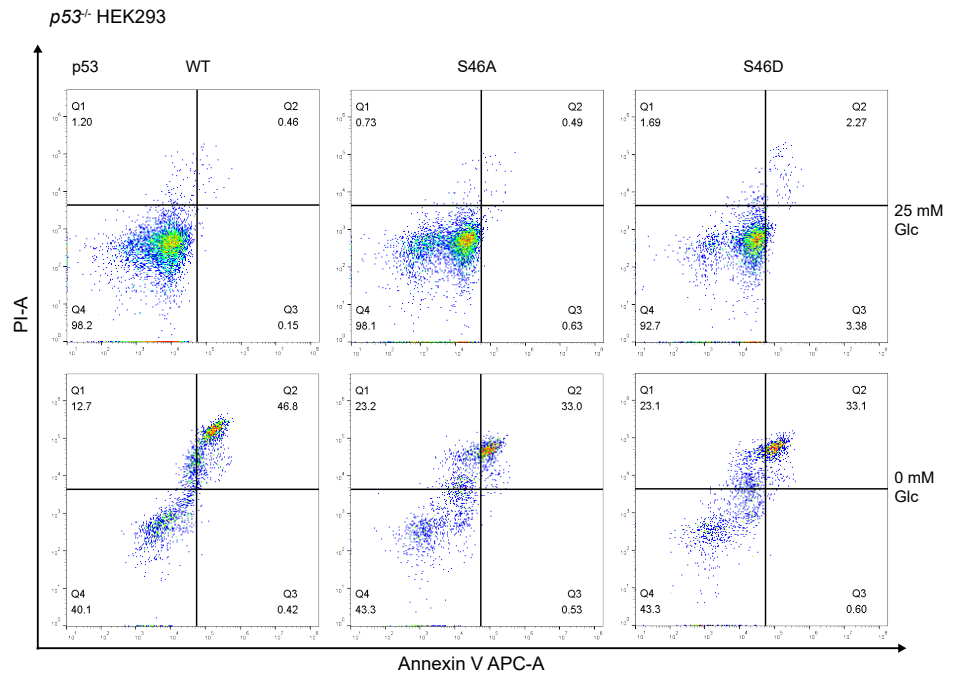

**Fig. S3 PHGDH unable to bind 3-PGA constitutively promotes apoptosis.** **a** Gating strategies used for quantifying the populations of apoptotic cells. During the analysis, intact cells from each sample were selected by FSC-A and SSC-A (left, using a linear scale), followed by FSC-H and FSC-width to exclude doublets (middle, using a linear scale). The fluorescence intensities of propidium iodide (PI) and Annexin V-FITC were then determined and displayed as density plots (right, using a log scale). The plot was divided into four quadrants (Q1, Q2, Q3, and Q4) in which Q2 and Q3 contain apoptotic cells while Q1 and Q2 are PI-positive cells. The percentage of apoptotic cells was then calculated. **b** Representative density plots of Fig. 4a. **c-f** 3-PGA-unoccupied PHGDH mutants induce apoptosis in HEK293 cells starved for glucose. Cells were treated as in Fig. 4a, except that the *PHGDH*<sup>-/-</sup> HEK293 cells were used. The levels of apoptotic cells were then determined via flow cytometry (**c**, data are means  $\pm$  SD,  $n = 3$ , with  $p$  values calculated by two-way ANOVA, followed by Tukey; see representative density plots in **d**), and the apoptotic markers by immunoblotting (**e** and **f**). **g** Glucose starvation-induced apoptosis depends on the phosphorylation of p53-Ser46. The *p53*<sup>-/-</sup> HEK293 cells with p53-S46A or p53-S46D expressed under a doxycycline-inducible promoter were used and treated as in Fig. 4a. The levels of apoptotic cells were determined via flow cytometry (data are means  $\pm$  SD,  $n = 3$ , with  $p$  values calculated by two-way ANOVA, followed by Sidak; see validation data of p53 expression levels in the right panel, and the representative density plots in the left panel). **h, i** Representative density plots of Fig. 4d, e. **j-m** PHGDH and Ser46-p53 phosphorylation are not required for apoptosis induced by prolonged glucose starvation. *PHGDH*<sup>-/-</sup> HEK293 cells (**k**) or SK-Hep-1 cells (**l**) with PHGDH-T57A, PHGDH-T78A, PHGDH-R135W or PHGDH-V261M expression, or *p53*<sup>-/-</sup> HEK293 cells with p53-S46A or p53-S46D expression (**m**), all under the doxycycline-inducible promoter, incubated in DMEM or glucose-free DMEM, both containing doxycycline (100 ng/ml), for 16 h, followed by determining the levels of apoptotic cells via flow cytometry. Data are means  $\pm$  SD,  $n = 3$ , with  $p$  values calculated by two-way ANOVA, followed by Sidak; see representative density plots in the lower panel. See also PHGDH-AXIN-p53-HIPK2 complex in **j**. Experiments in this figure were performed three times.
